# Supplementary material for: PLK1 stabilizes a MYC-dependent kinase network in aggressive B cell lymphomas
Source: JCI journal article supplement (doi:10.1172/jci122533), 2018-09-27

## Supplemental figures and figure legends

Supplemental Figure 1

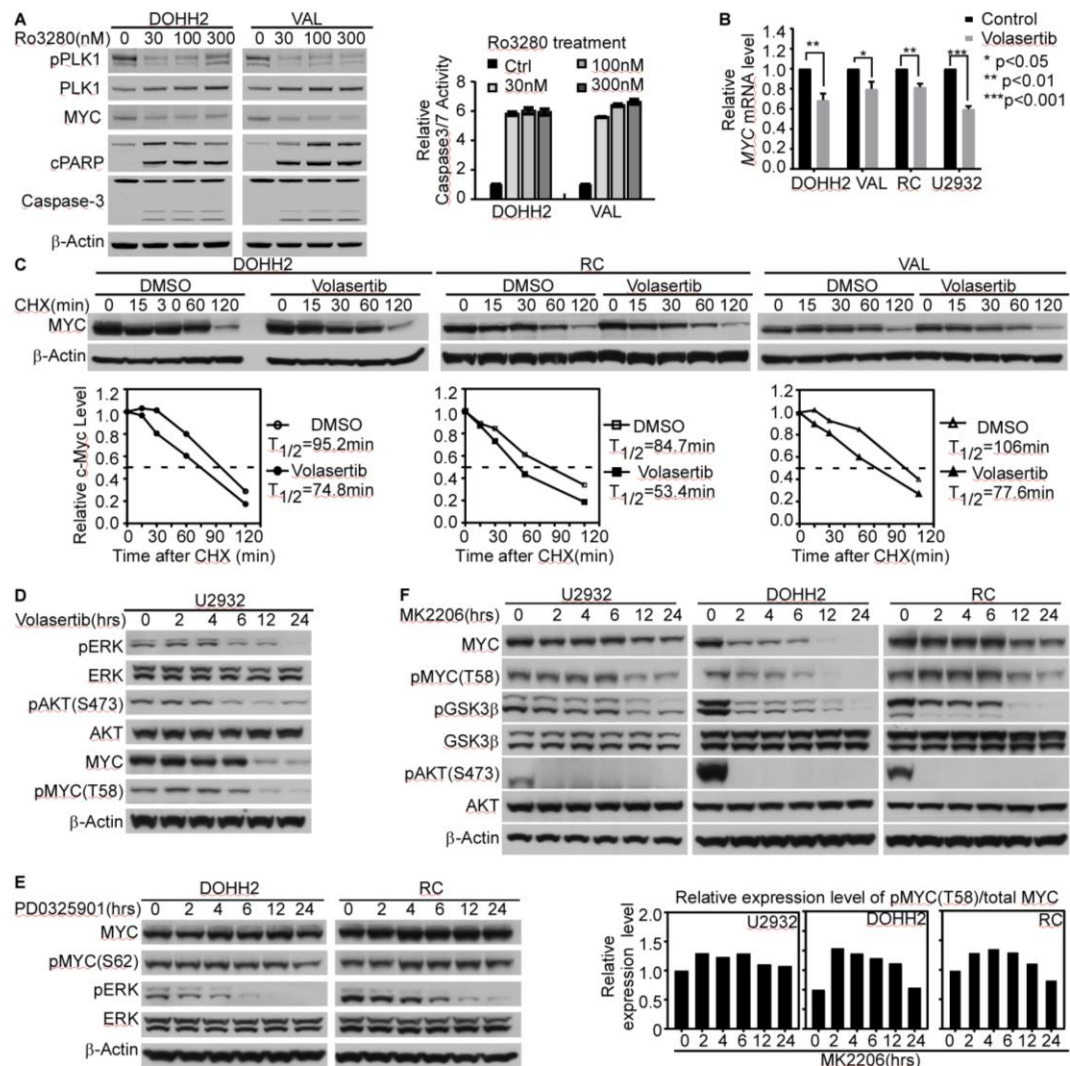

**Supplemental Figure 1.** PLK1 is necessary to sustain an AKT-GSK3 $\beta$ -MYC circuit in DHL. **(A) Left**, western blot analyses demonstrate that treatment of the indicated DHL cells with the PLK1 inhibitor Ro3280 (24 hours) provokes reductions in MYC protein levels, PLK1 phosphorylation, and PARP cleavage. **Right panel**, Ro3280 treatment (24 hours) provokes apoptosis of DOHH2 and VAL DHL cells as judged by caspase-3/7 activation. **(B)** Volasertib treatment (20 nM, 24 hours) induces modest reductions changes of MYC mRNA levels in DHL cells. **(C)** Turnover of MYC protein in DHL cells (DOHH2, RC, and VAL) with either control DMSO or volasertib treatment (20 nM, 3 hours) +/- 15 minute pre-treatment with cycloheximide (CHX, 100  $\mu$ M/ml). Lysates were prepared at the indicated times following the addition of CHX and probed with the indicated antibodies (*upper panels*) and MYC levels were quantified by LICOR, and were normalized to  $\beta$ -actin (*lower panels*). **(D)** Immunoblots documenting Volasertib-induced reductions in activation of ERK1/2 and AKT, and in pT58-MYC phosphorylation in U2932 DHL cells. **(E)** Efficient ERK1/2 inhibition in DHL cells (see pERK panel) by

treatment with the inhibitor PD0325901 (10 nM) has no effect on MYC phosphorylation at S62 or on total levels of MYC protein in DHL cells. **(F)** Immunoblots documenting the repressive effects of efficient inhibition of AKT by MK2206 (see pS473-AKT panels) on levels of MYC, pT58-MYC, pGSK3 $\beta$ , and total GSK3 $\beta$  in the indicated DHL cells. Data shown in **(A-F)**, are representative or means  $\pm$  SD of at least 3 independent experiments.

### Supplemental Figure 2

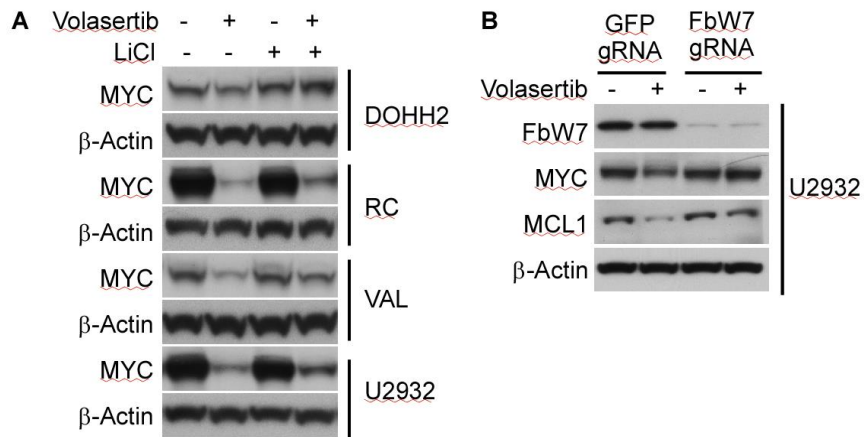

**Supplemental Figure 2.** Inhibition of GSK3 $\beta$  signaling or FBW7 impairs reductions of MYC protein provoked by Volasertib. **(A)** GSK3 $\beta$  inhibition provoked by lithium chloride (LiCl) treatment (10 mM) impairs Volasertib-induced reductions in MYC protein in DHL cells. **(B).** Knockout of *FBW7* impairs Volasertib-induced reductions in MYC protein levels. Data shown in **A** and **B** are representative of at least 3 independent analyses.

**Supplemental Figure 3**

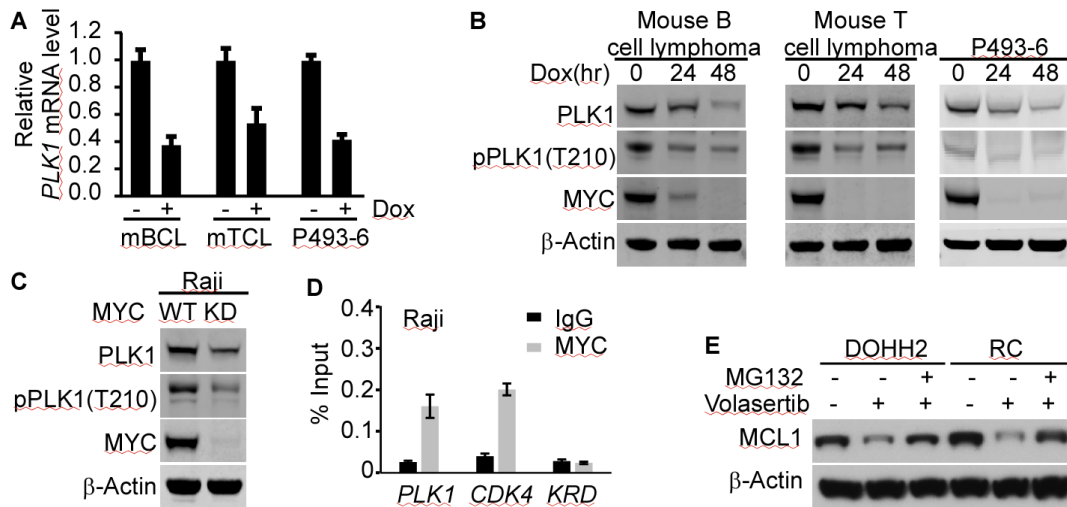

**Supplemental Figure 3.** MYC controls *PLK1* transcription in lymphoma cells. **(A)** MYC depletion suppresses *PLK1* mRNA levels in human B-lymphoma (P493-6) and mouse B and T lymphoma cells (mBCL, mTCL) bearing a tetracycline (Dox)-repressible MYC transgene. mRNAs were measured 24 hours after addition of Dox to these cells. **(B)** Immunoblots documenting that MYC depletion by Dox treatment of P493-6, mBCL or mTCL lymphoma cells triggers reductions in PLK1 protein levels and in the levels of active pT210-PLK1. **(C)** MYC knockout-knockdown in Raji BL by CRISPR/cas9 editing leads to marked reductions in PLK1 protein and phospho-PLK1 levels. **(D)** ChIP assays showing a significant increase in MYC recruitment to the E-box motif of *PLK1* as well as to the promoter region of the known MYC target *CDK4* in Raji BL cells. ChIP with immunoglobulin G (IgG) isotype control antibody showed MYC binding was specific; *KRD* ChIP is a negative (i.e., a non-MYC regulated) control gene. **(E)** Volasertib-induced reductions in MCL-1 protein levels are blocked by pre-treatment with the proteasome inhibitor MG132. **A-E** are representative of, or the mean  $\pm$  SD of, at least 3 independent experiments.

**Supplemental Figure 4**

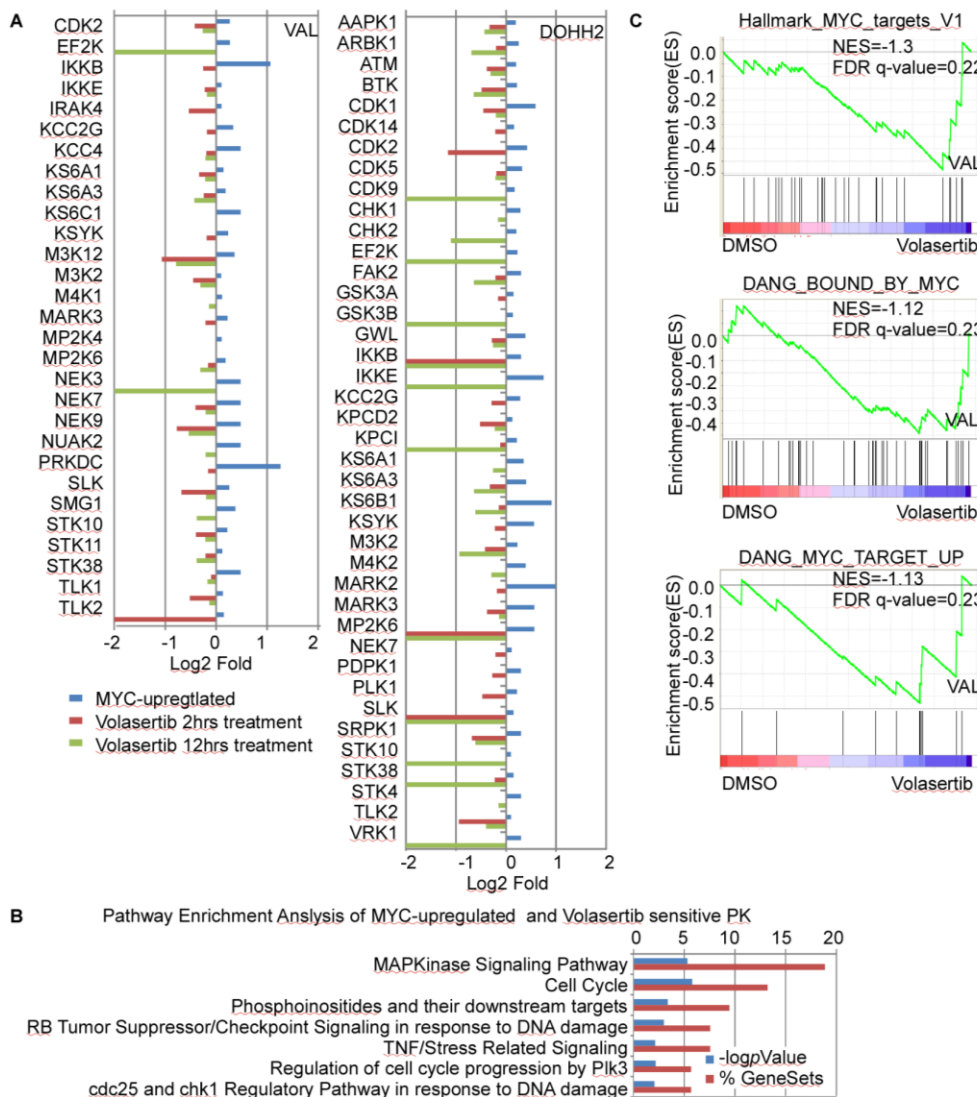

**Supplemental Figure 4.** PLK1 inhibition disables the MYC-directed transcriptome and kinome in DHL. **(A)** Overlapping MYC-upregulated and volasertib-sensitive kinases in DHL. **(B)** Pathway enrichment analysis of MYC-upregulated and volasertib-sensitive protein kinases from (A). **(C)** GSEA analysis shows that changes in the ABPP profile provoked by volasertib treatment in VAL DHL cells are negatively related to the HALLMARK\_MYC\_TARGETS\_V1 signature and CANG\_BOUND\_BY\_MYC, and to DANG\_MYC\_TARGETS\_UP gene sets from Molecular Signatures Database.

Fig. 1 A

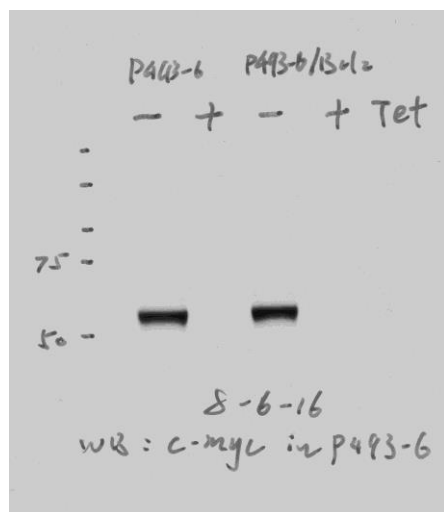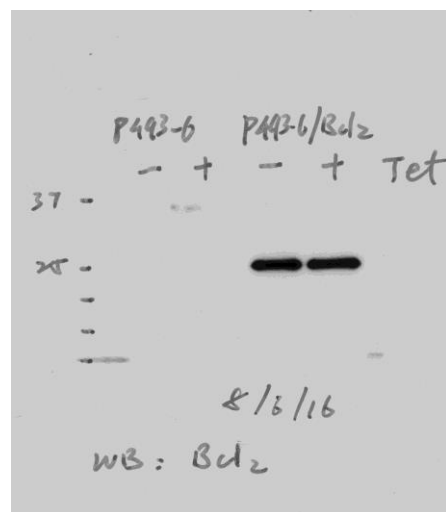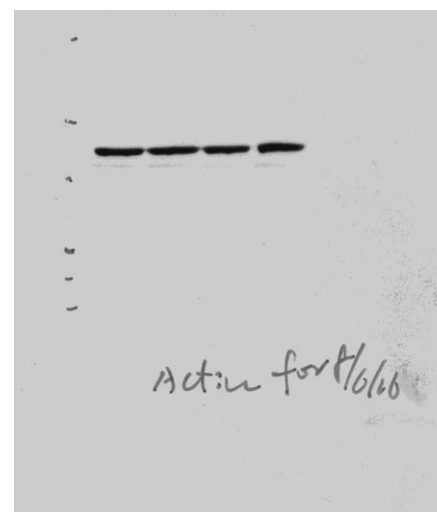

Fig.1 B

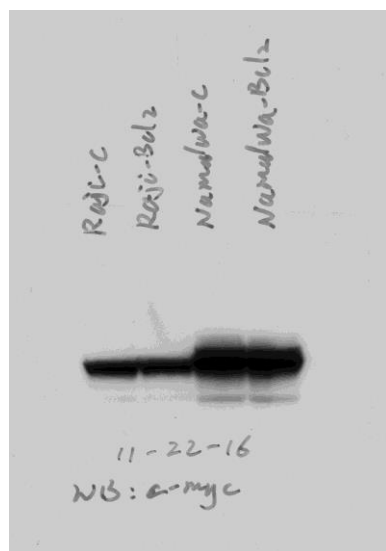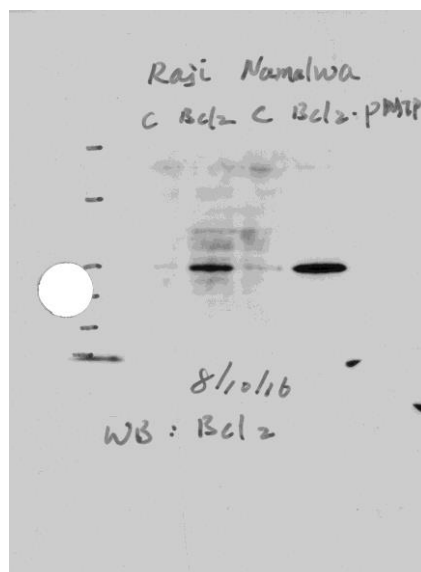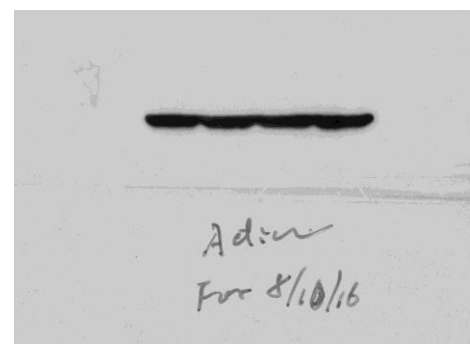

Fig. 1 C

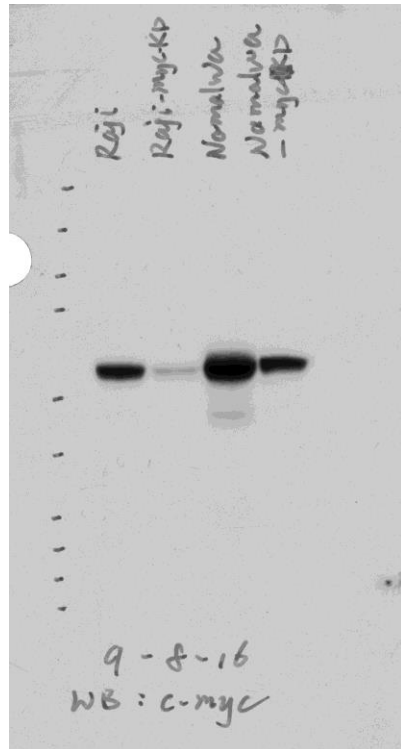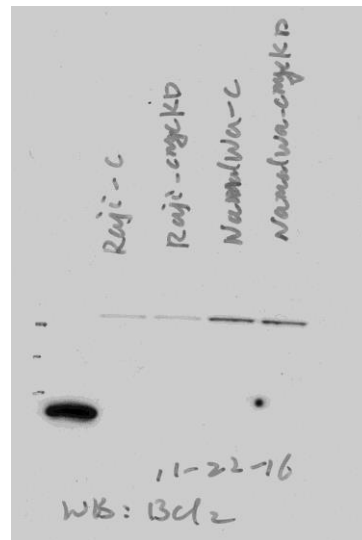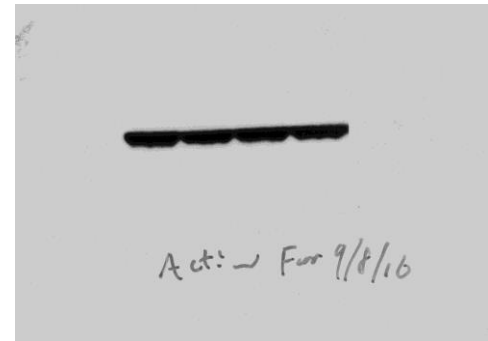



Fig.3 C

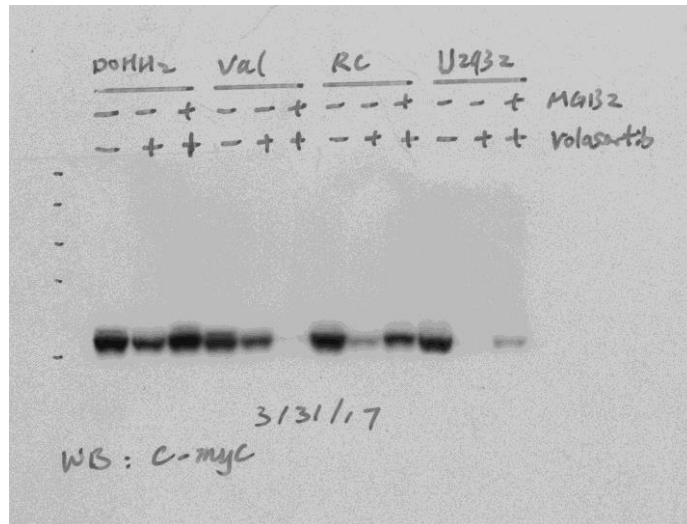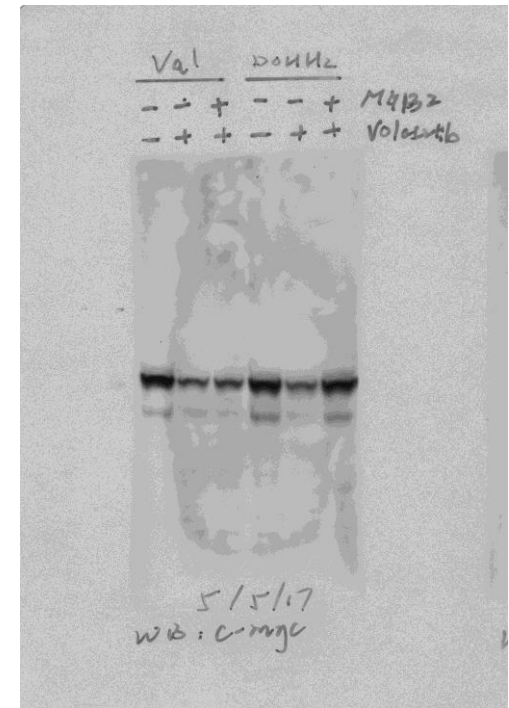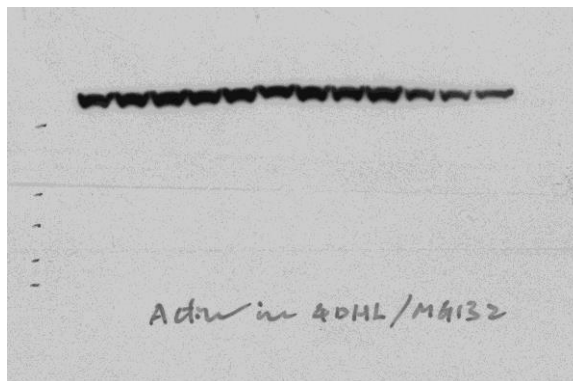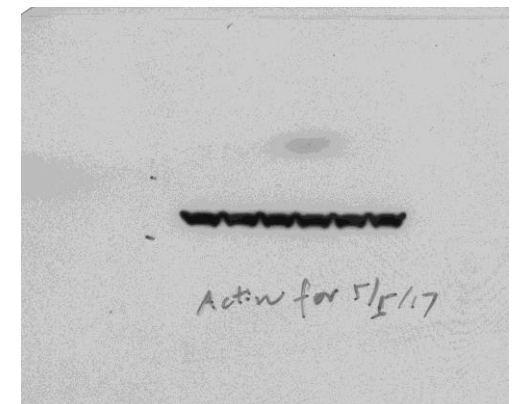

Fig. 3 D

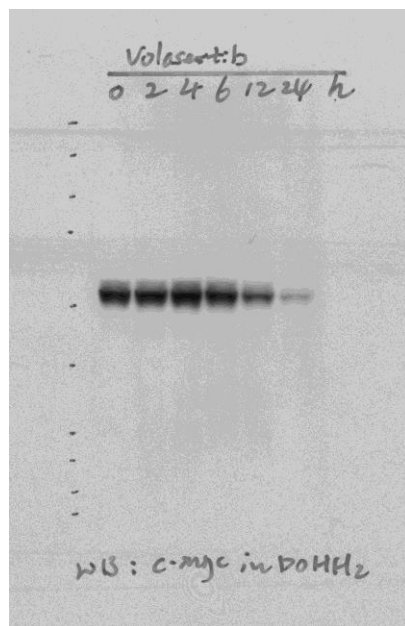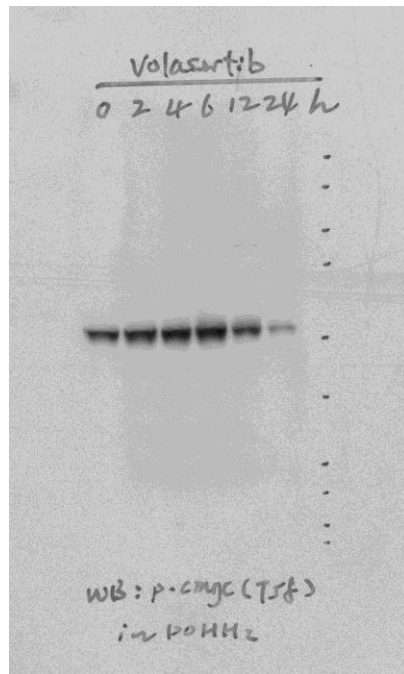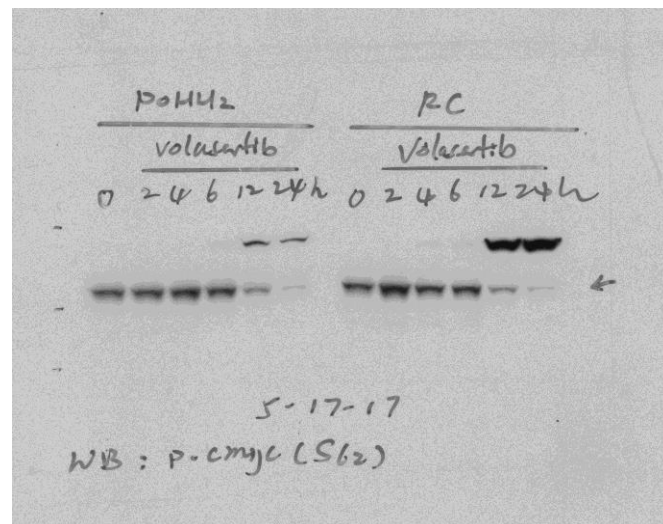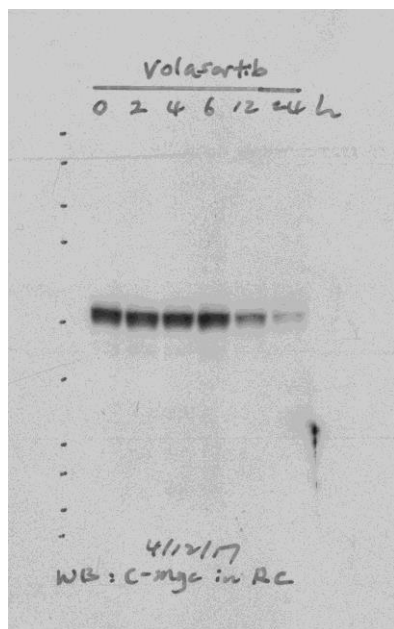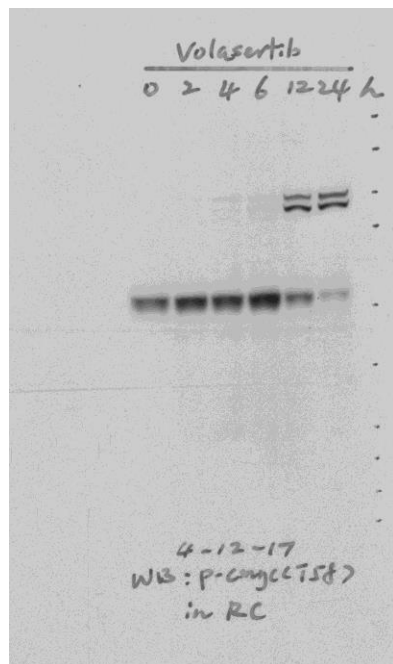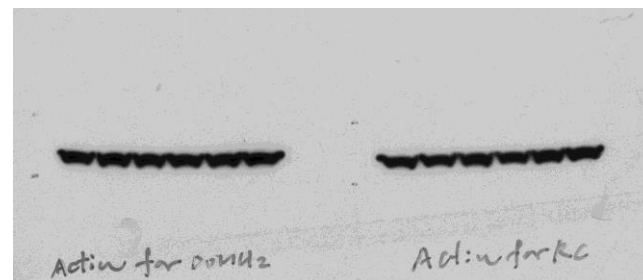

Fig.3 D

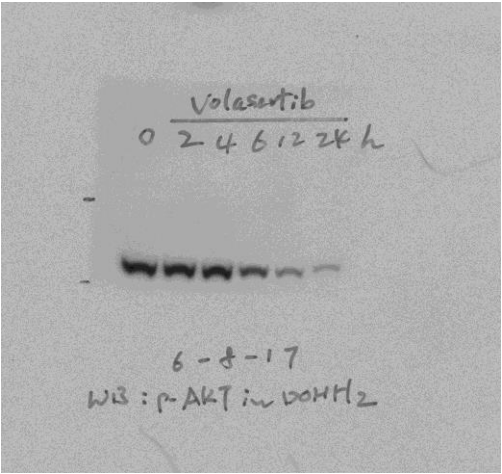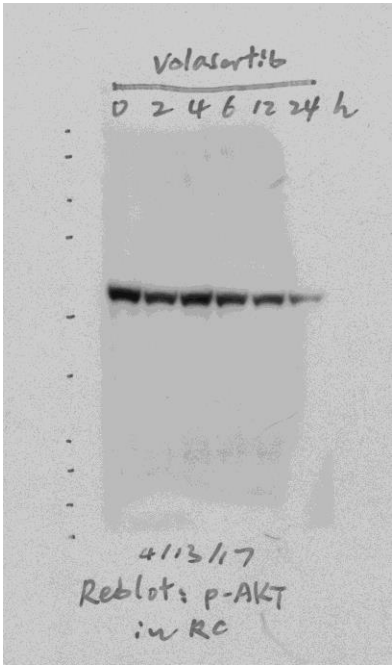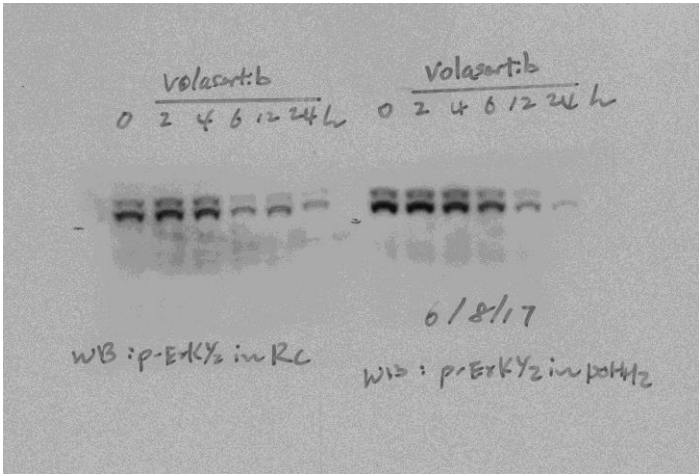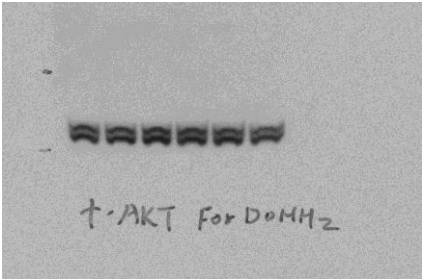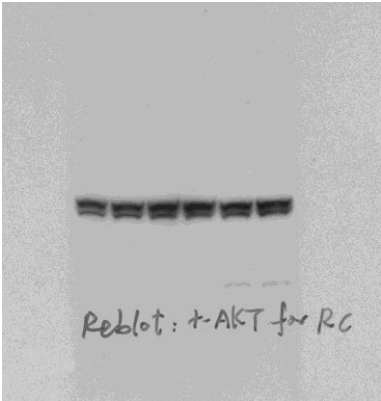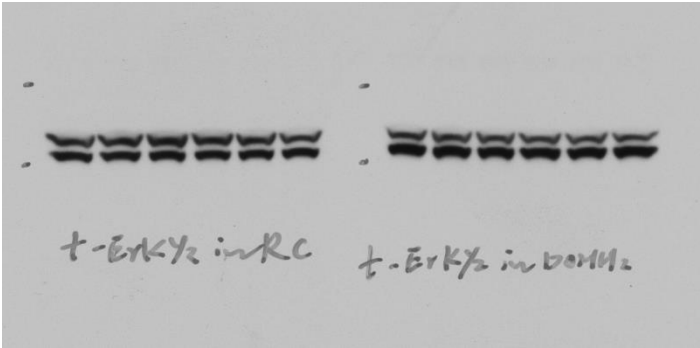

Fig.3 D

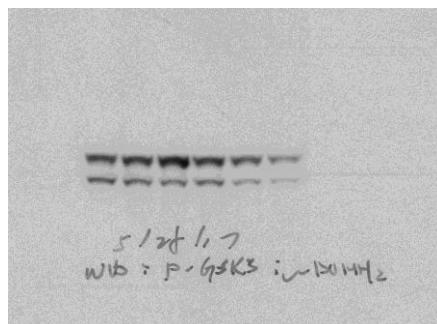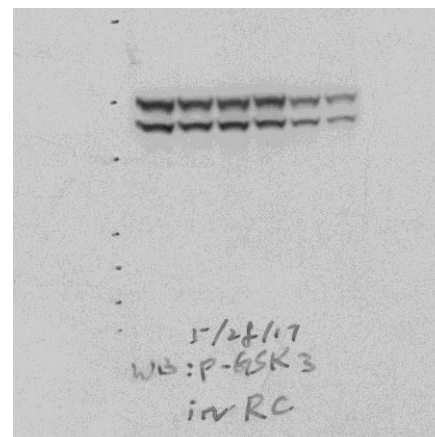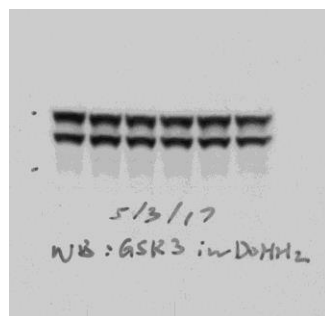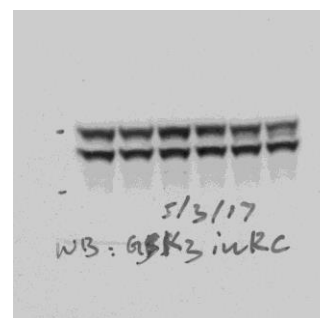

Fig.3 E

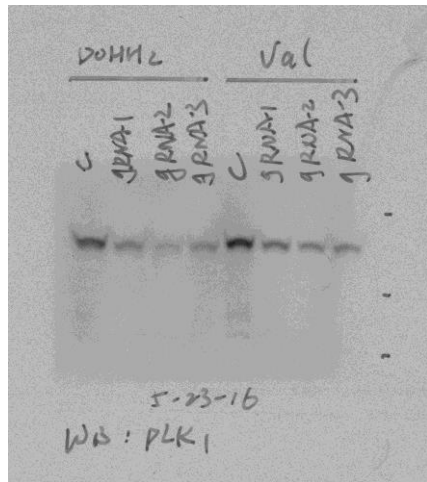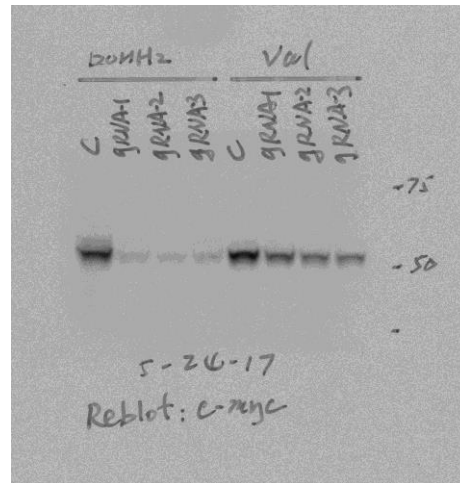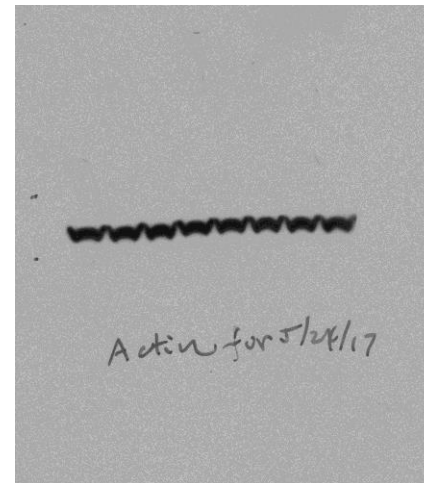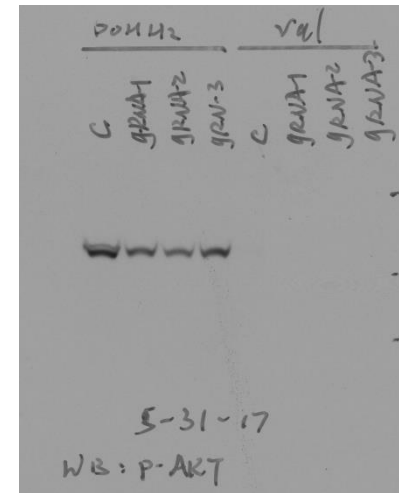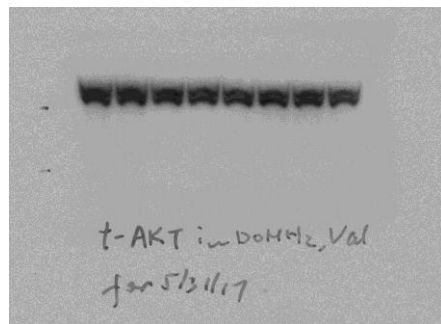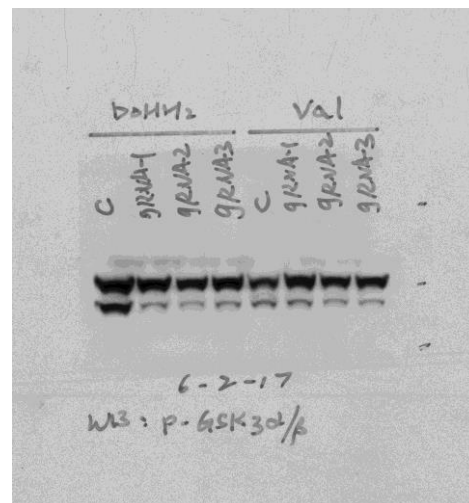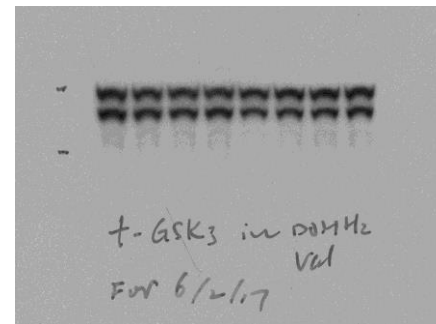

Fig.3 F

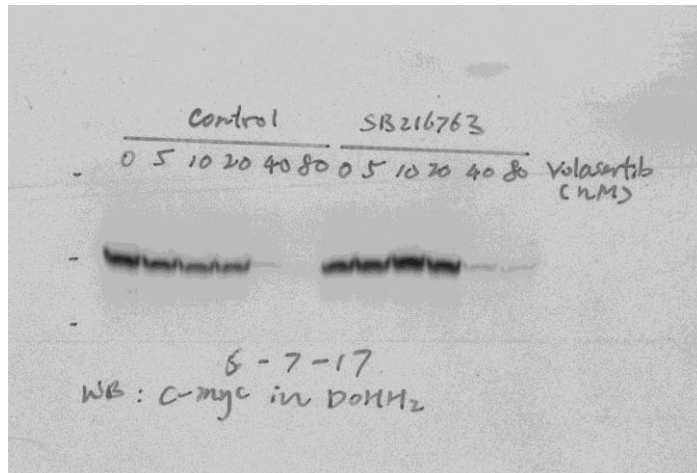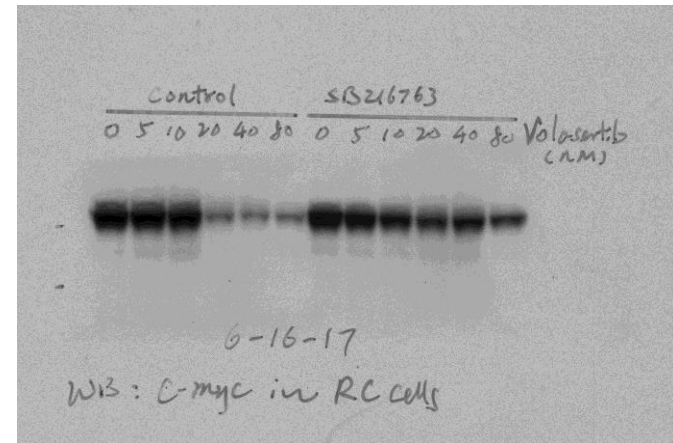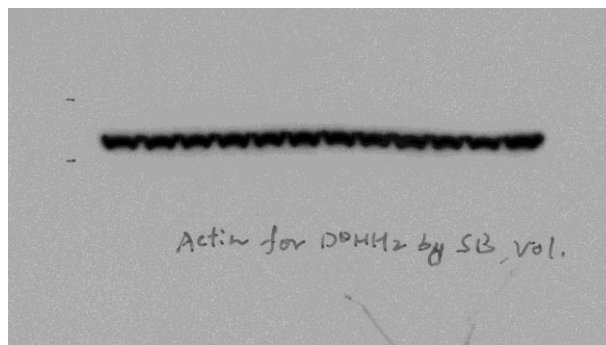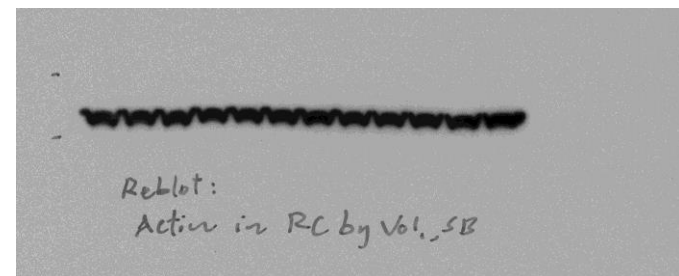

Fig.3 G

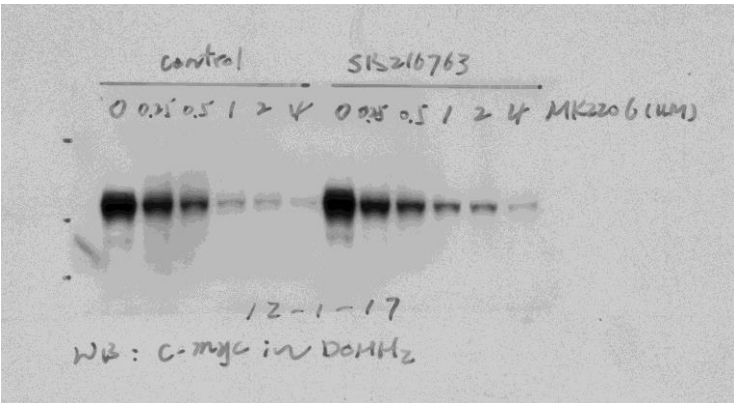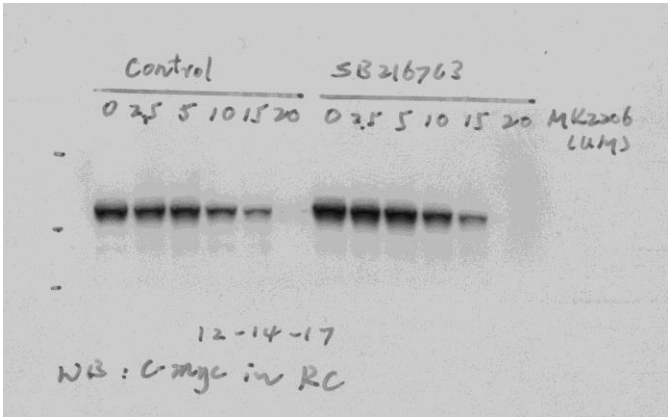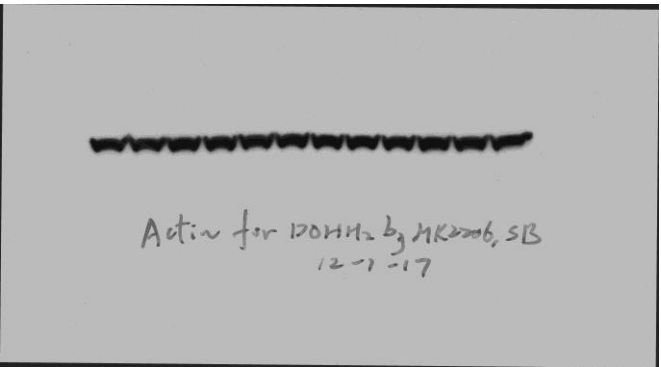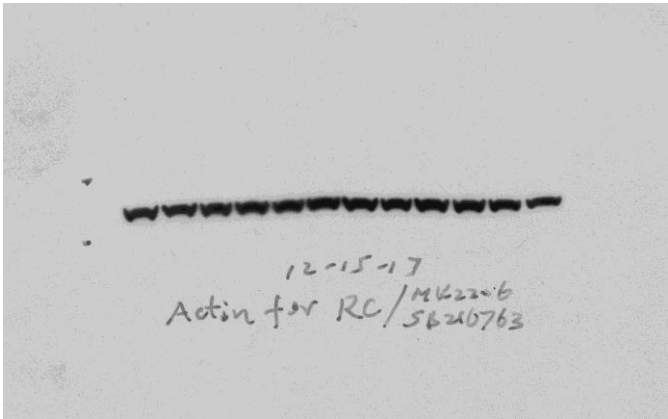

Fig.4 A

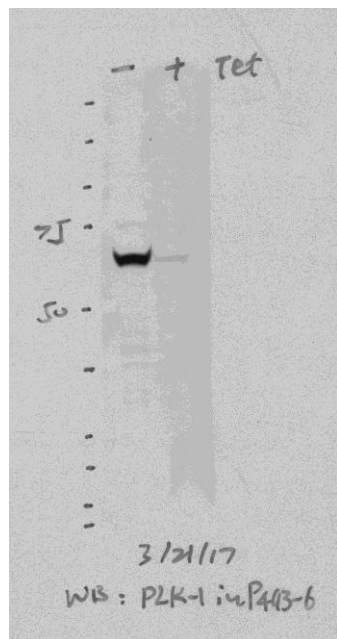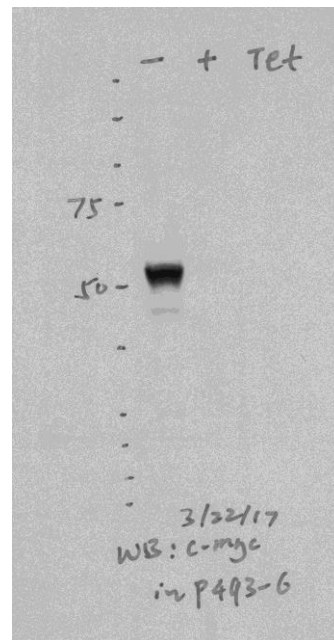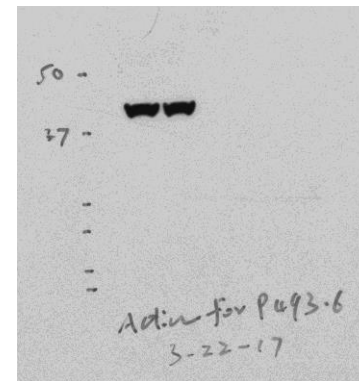

Fig.4 B

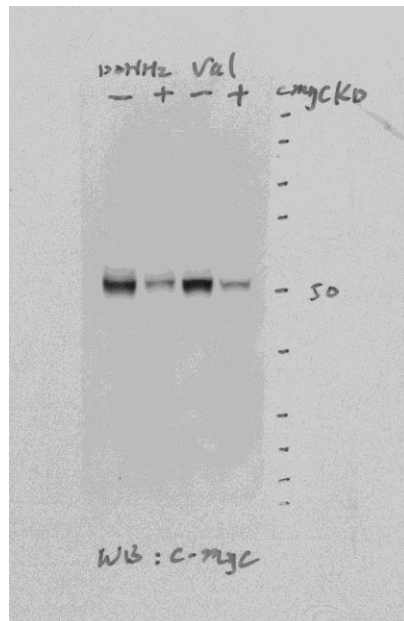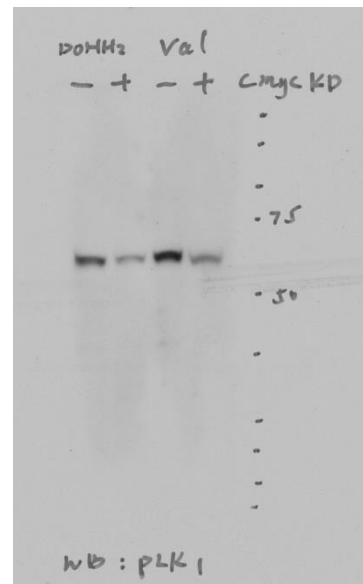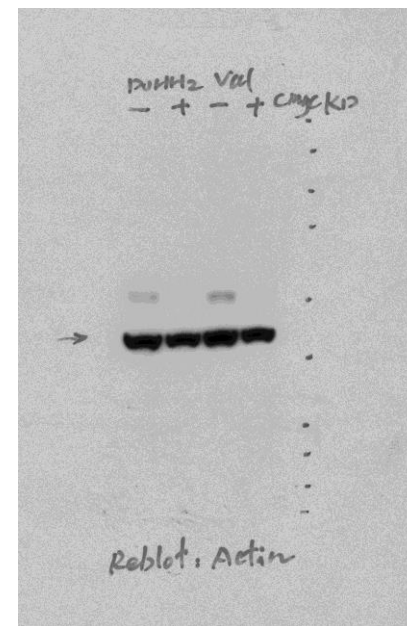

Fig.5 C

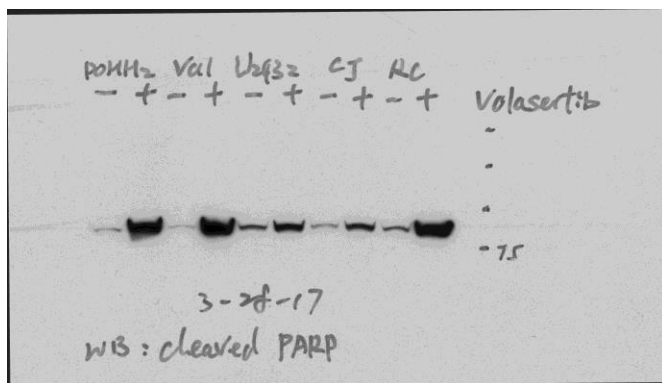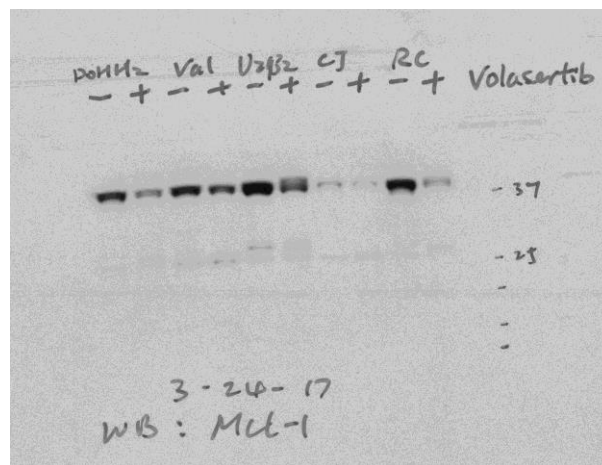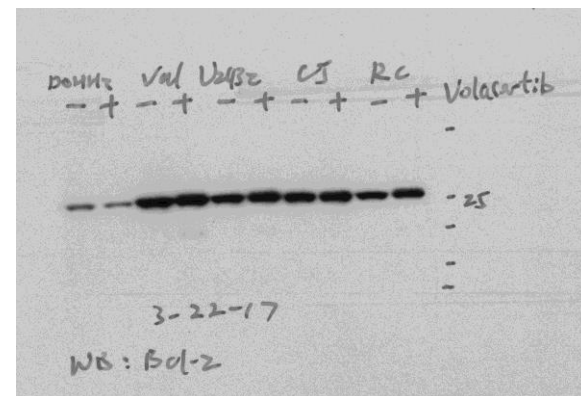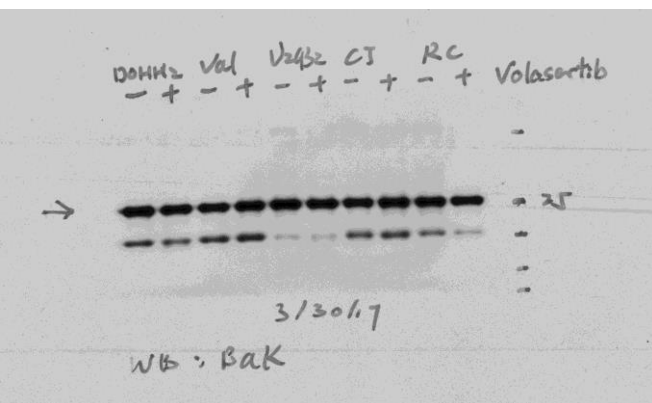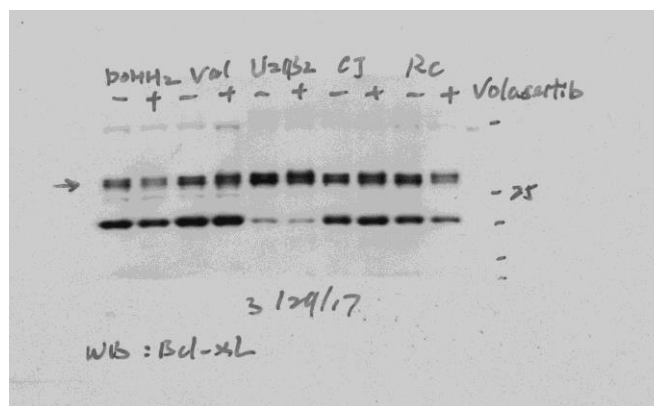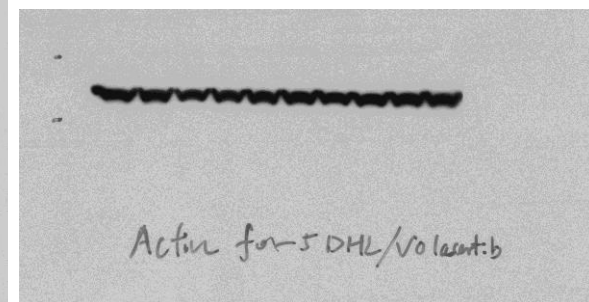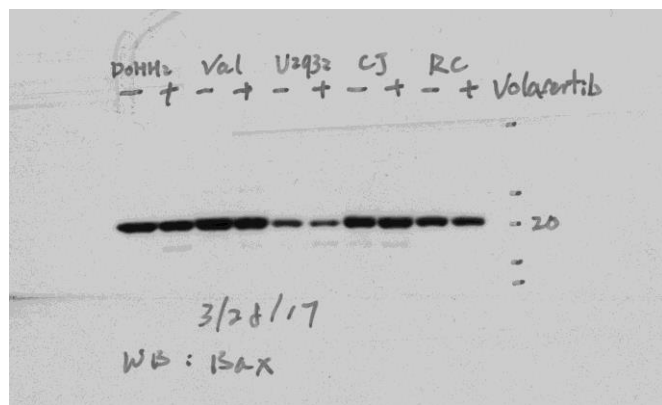

Fig. 7E

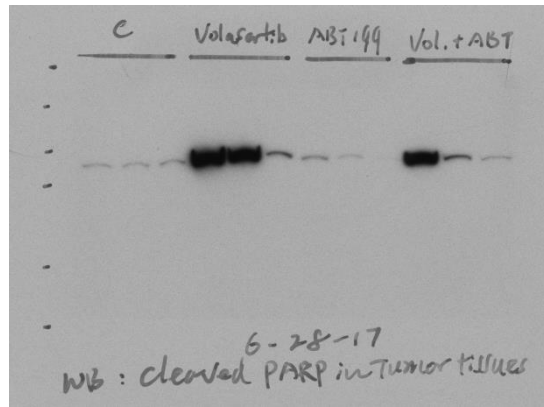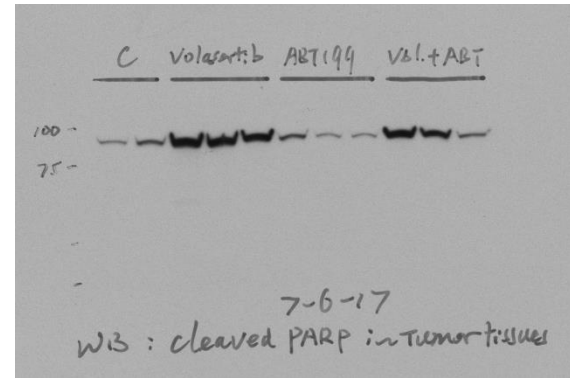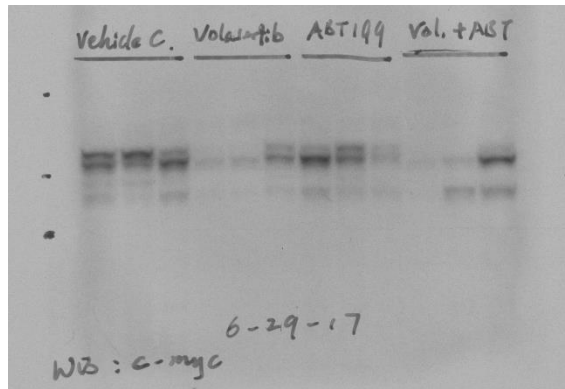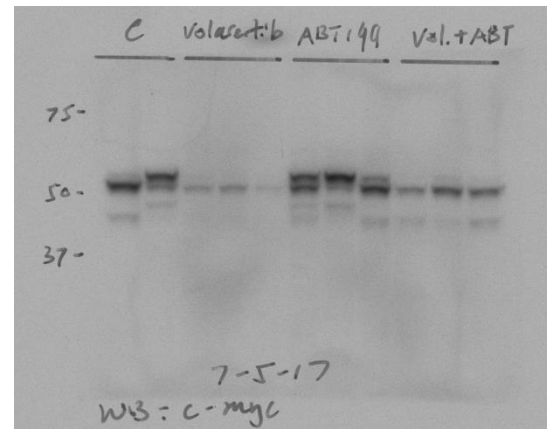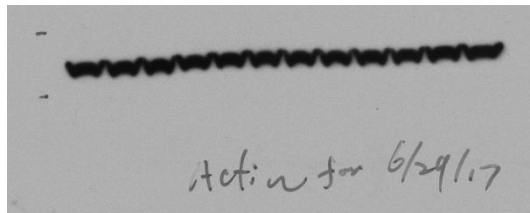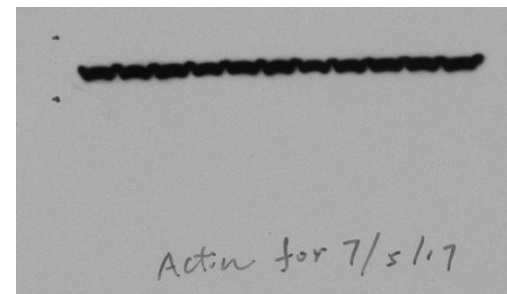

Fig.7E

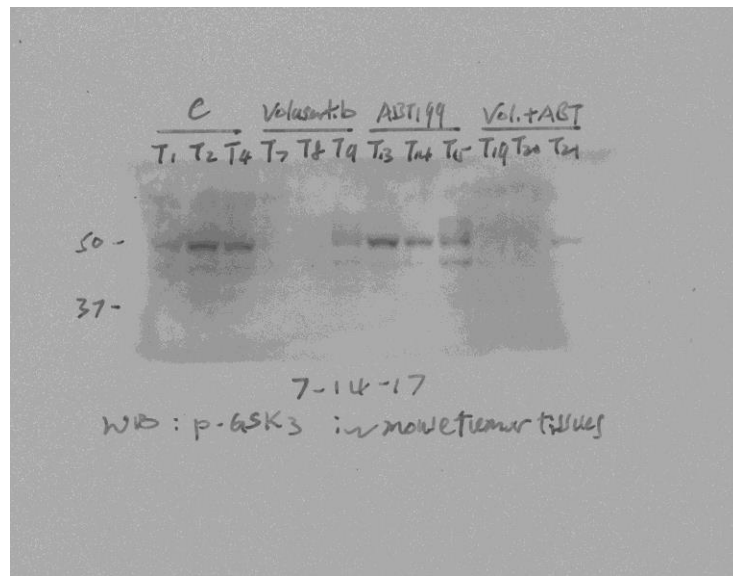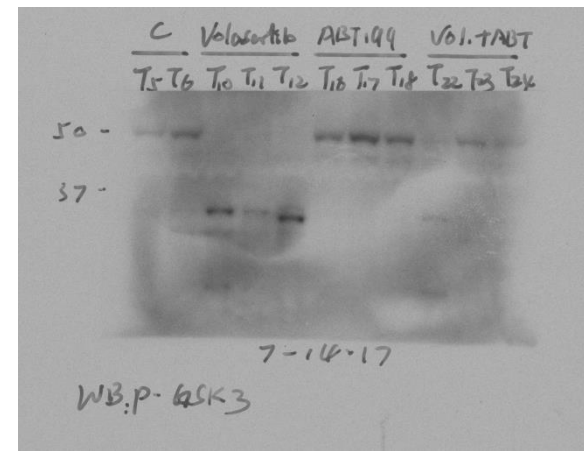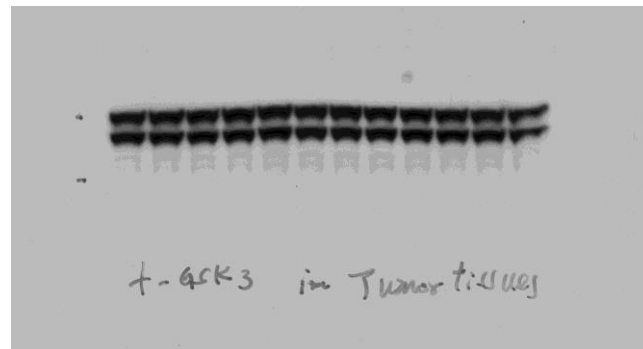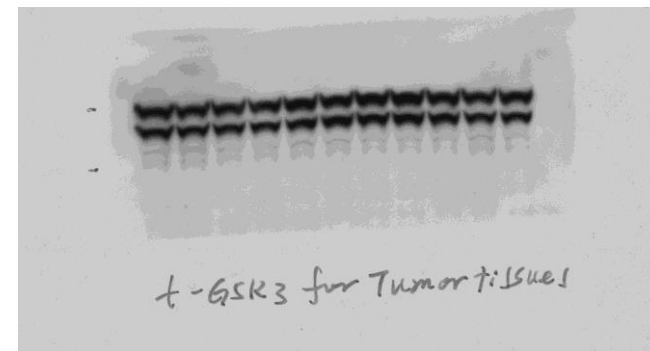

# Supplementary Figure 1A

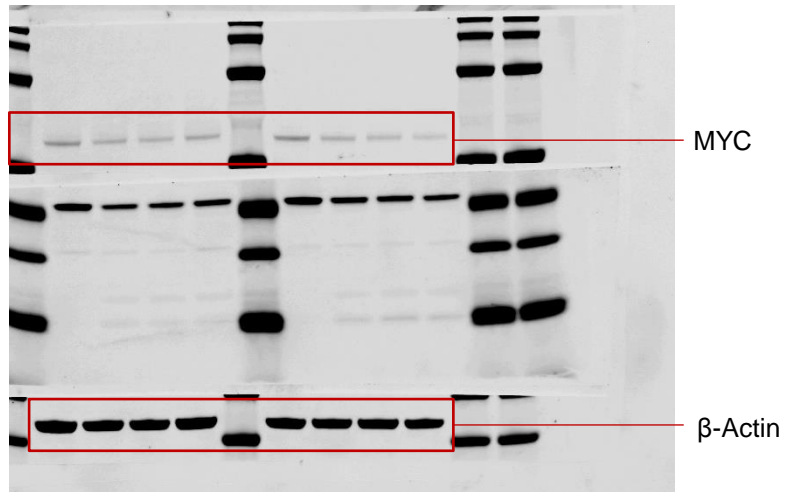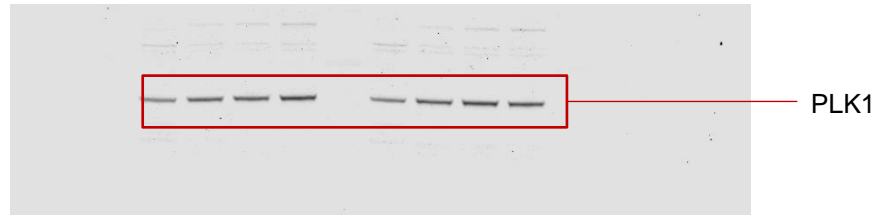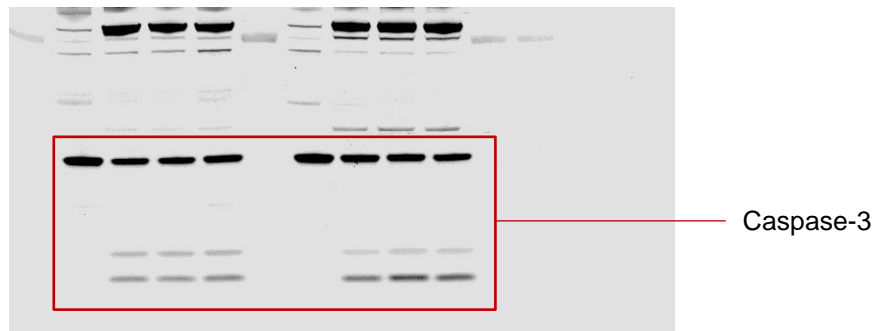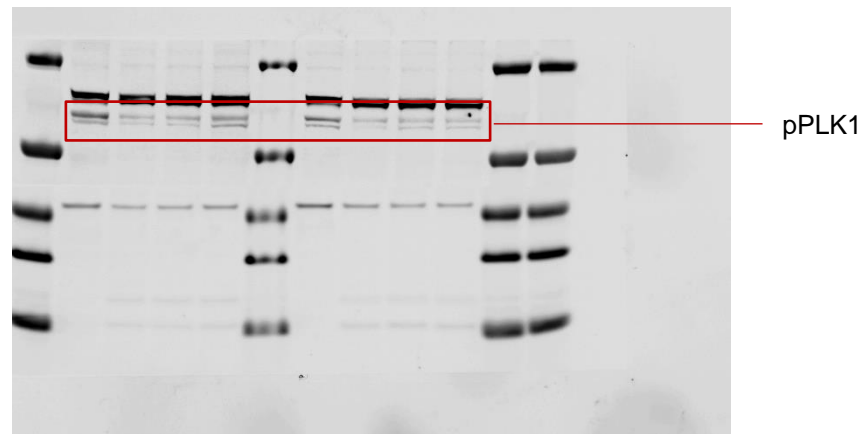

Supplementary Fig.1 C

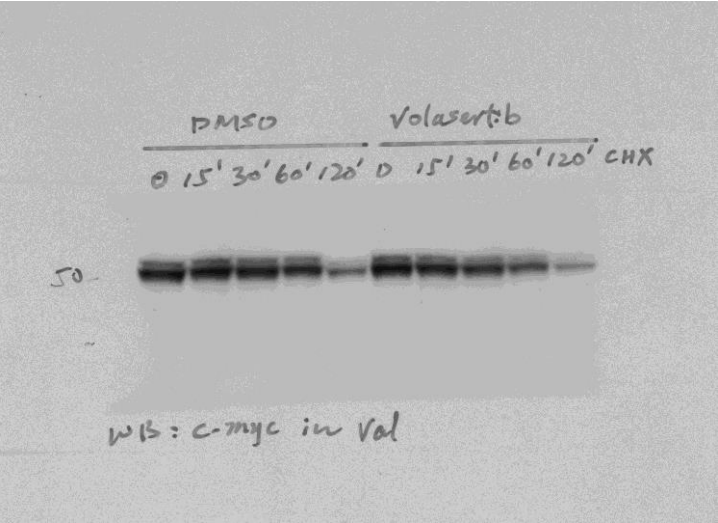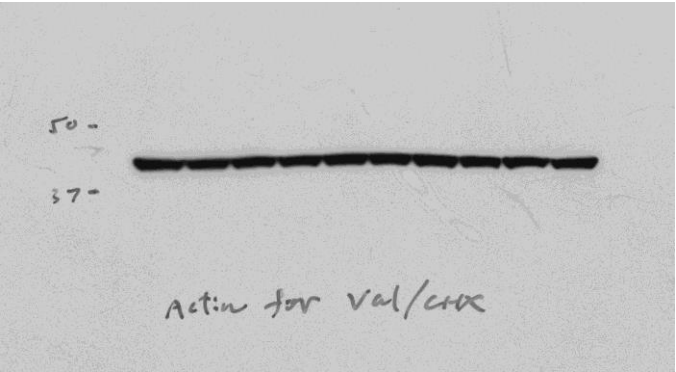

Supplementary Fig.1 C

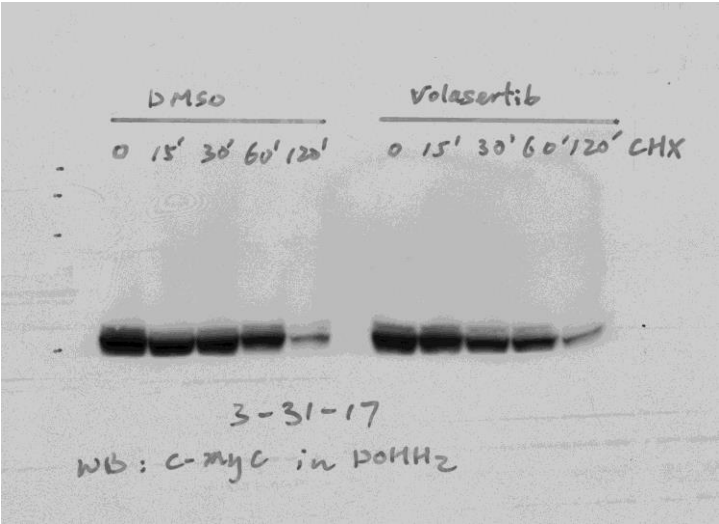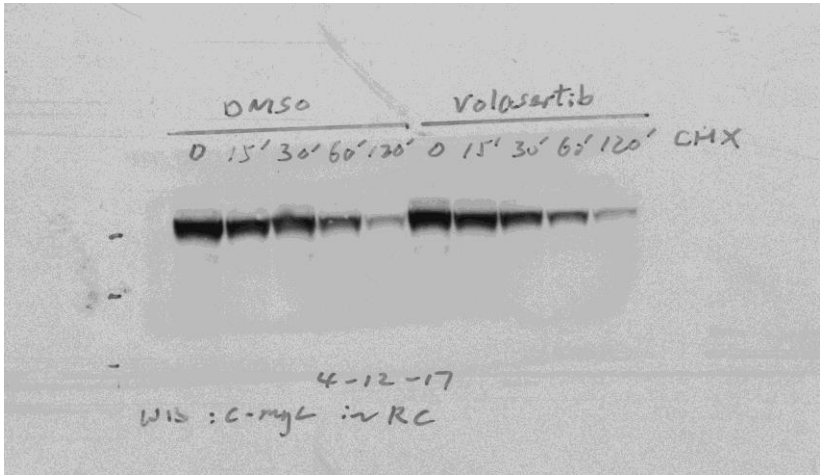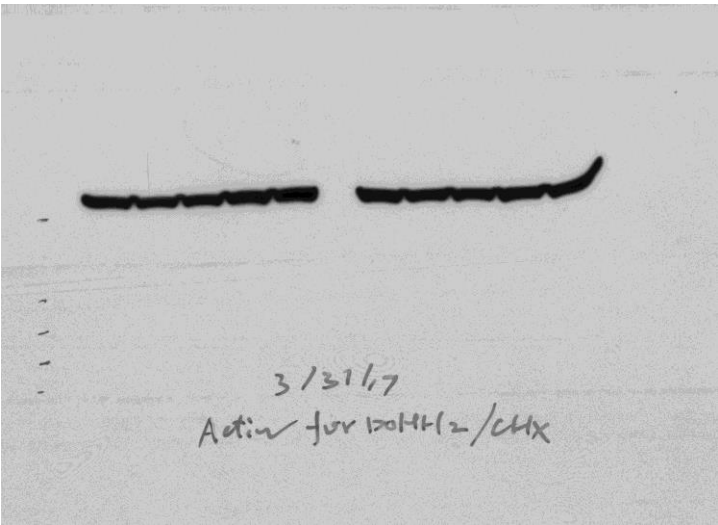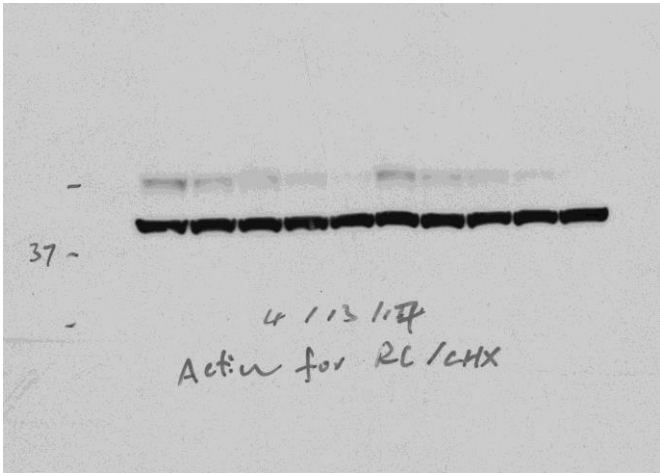

Supplementary Fig.1 D

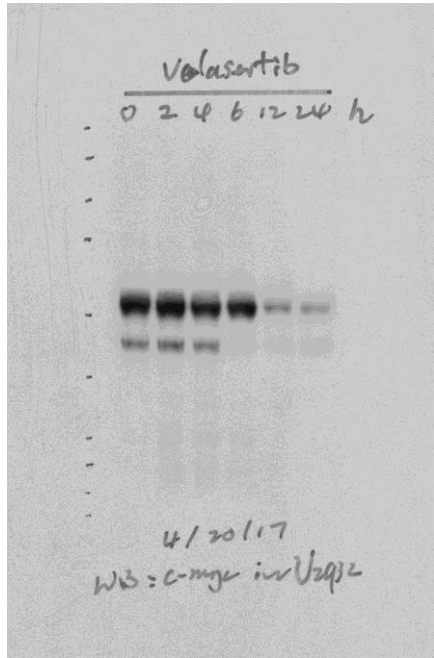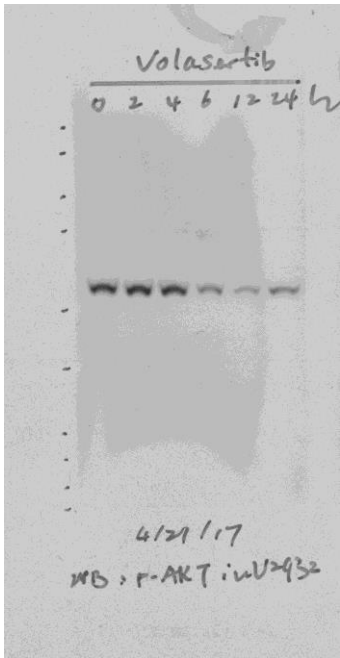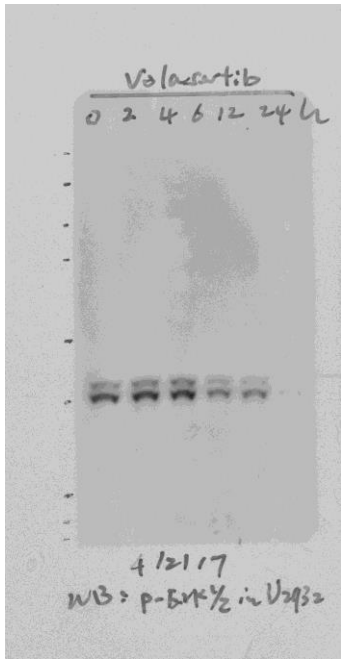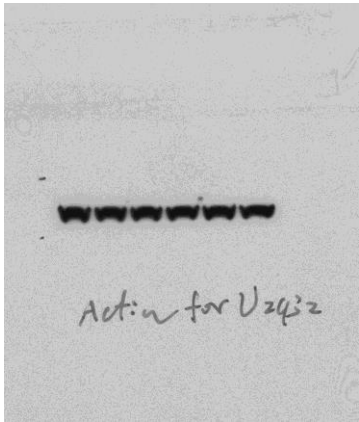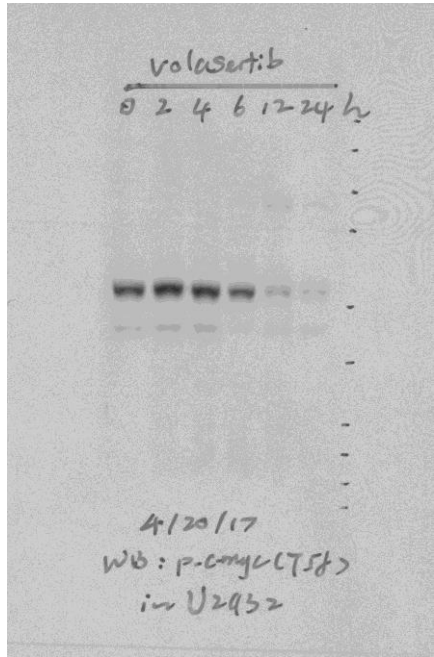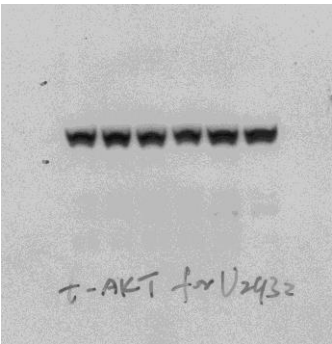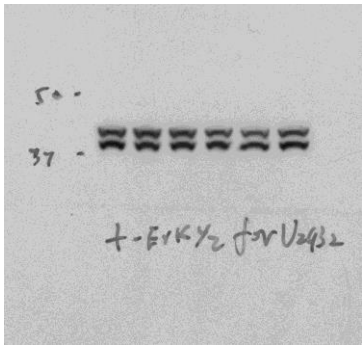

Supplementary Fig.1 E

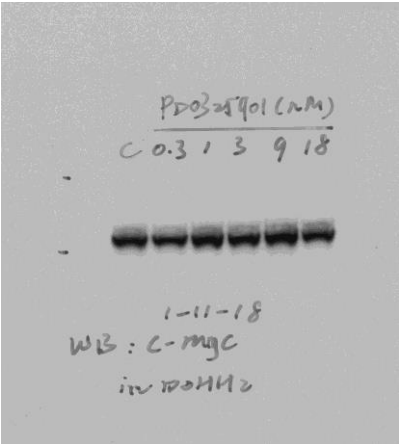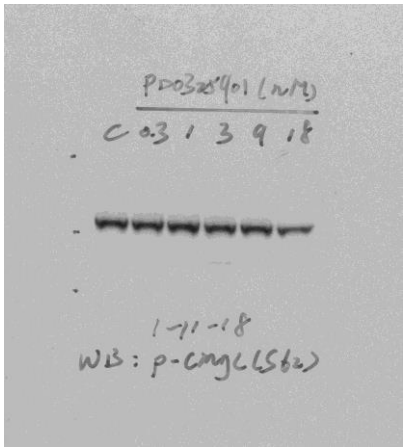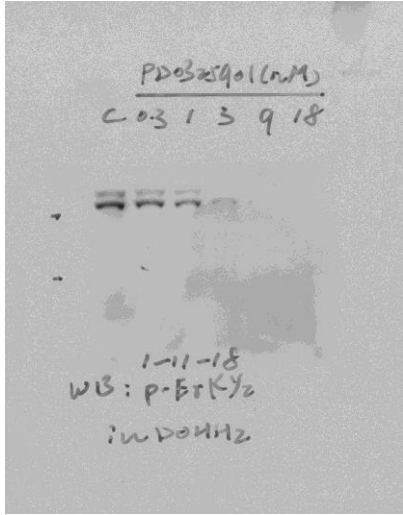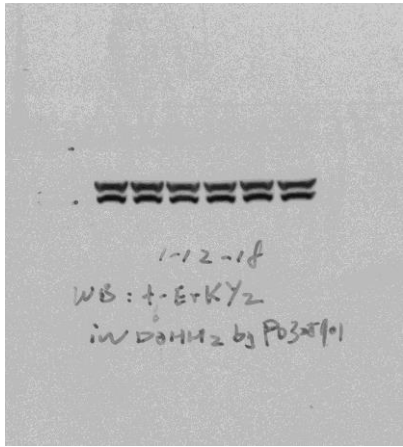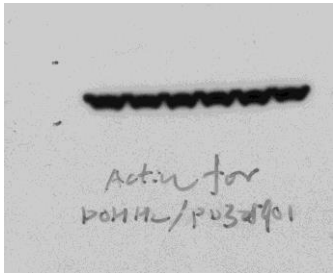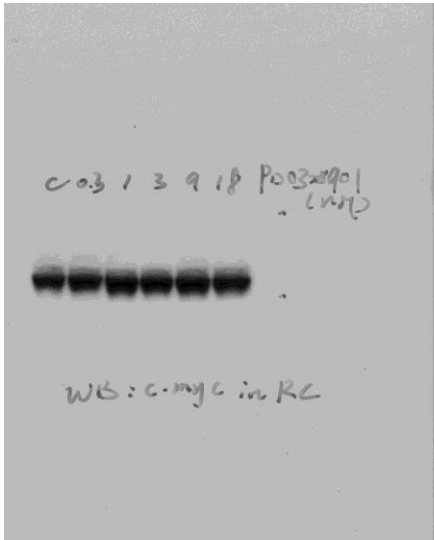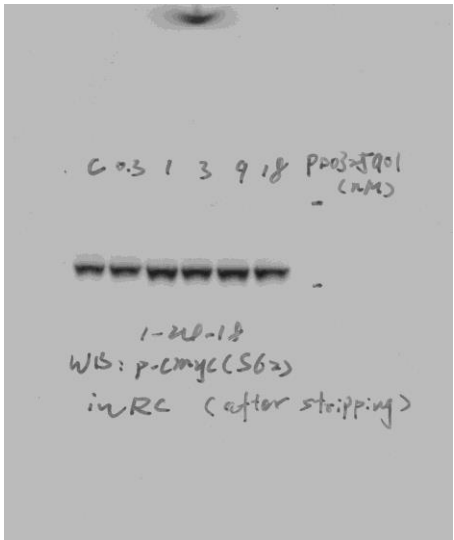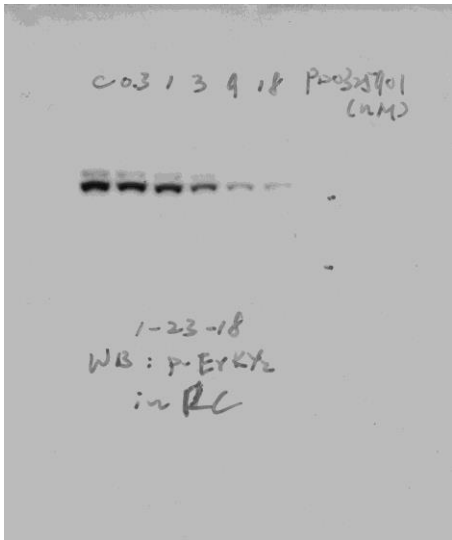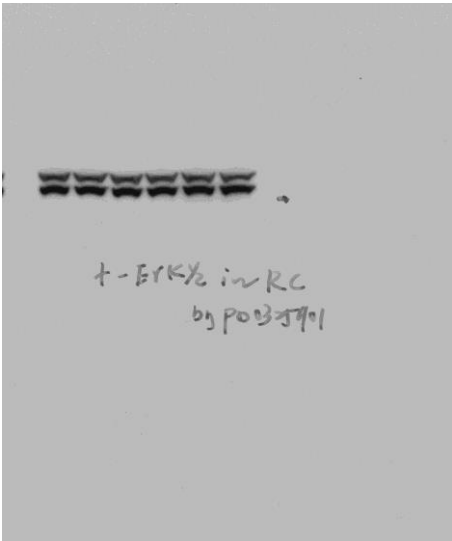

Supplementary Fig.1 E

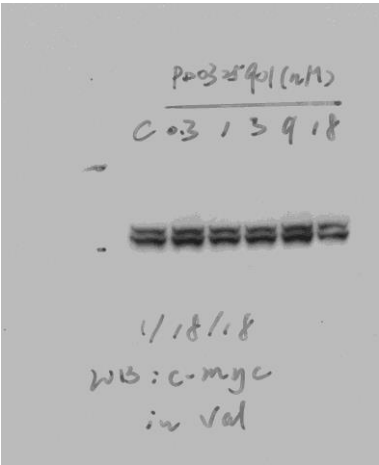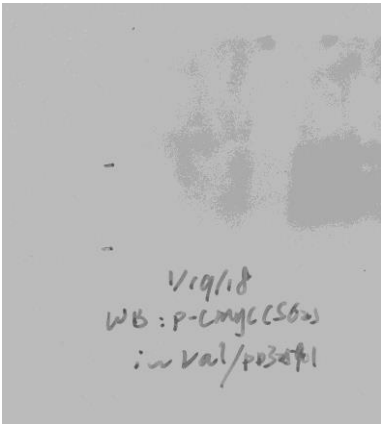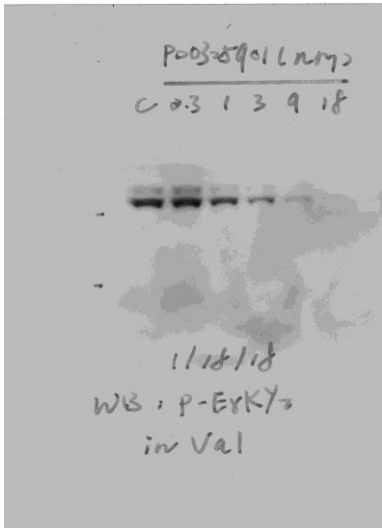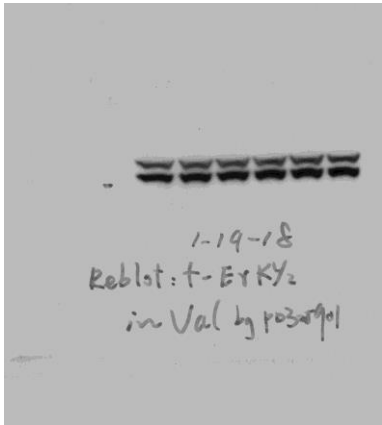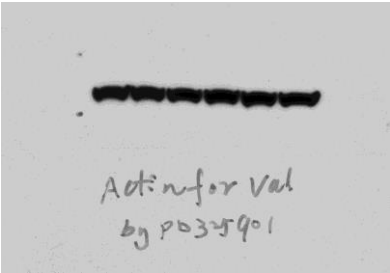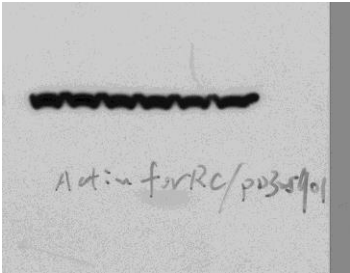

Supplementary Fig.1 F

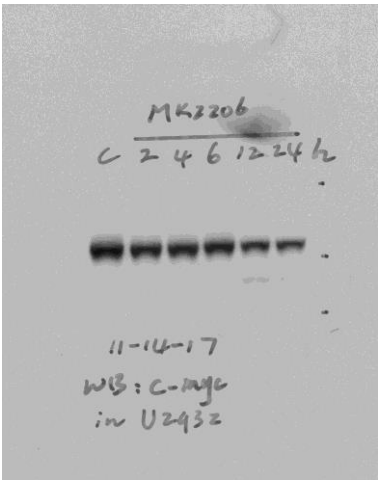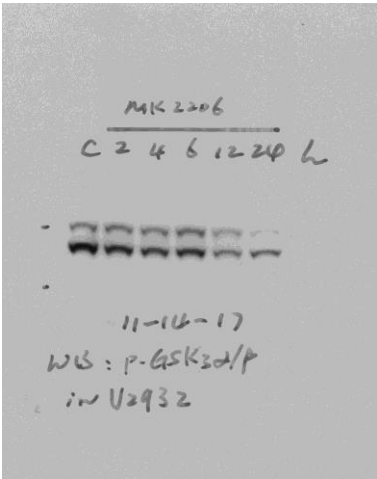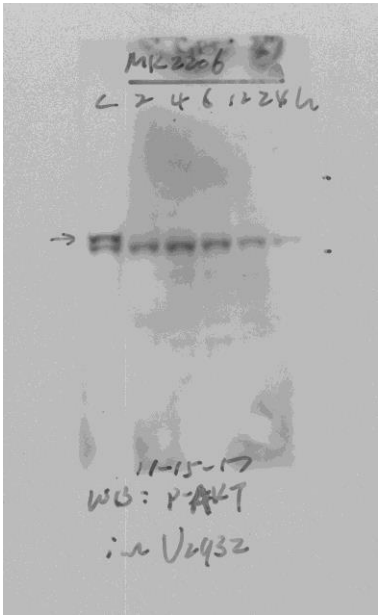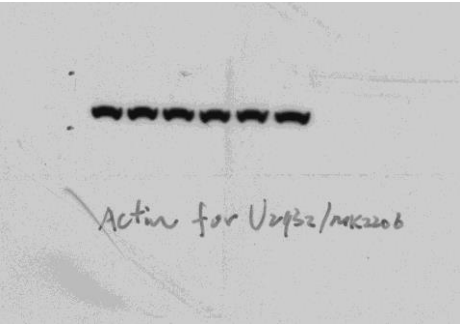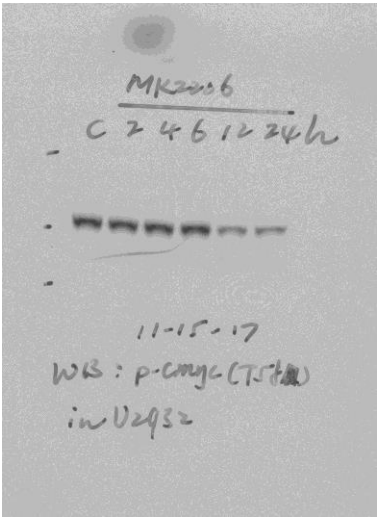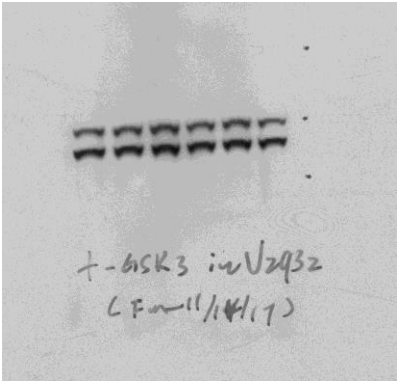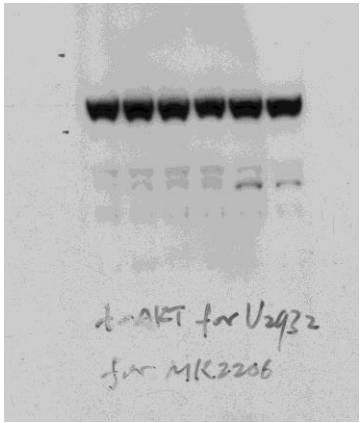

Supplementary Fig.1 F

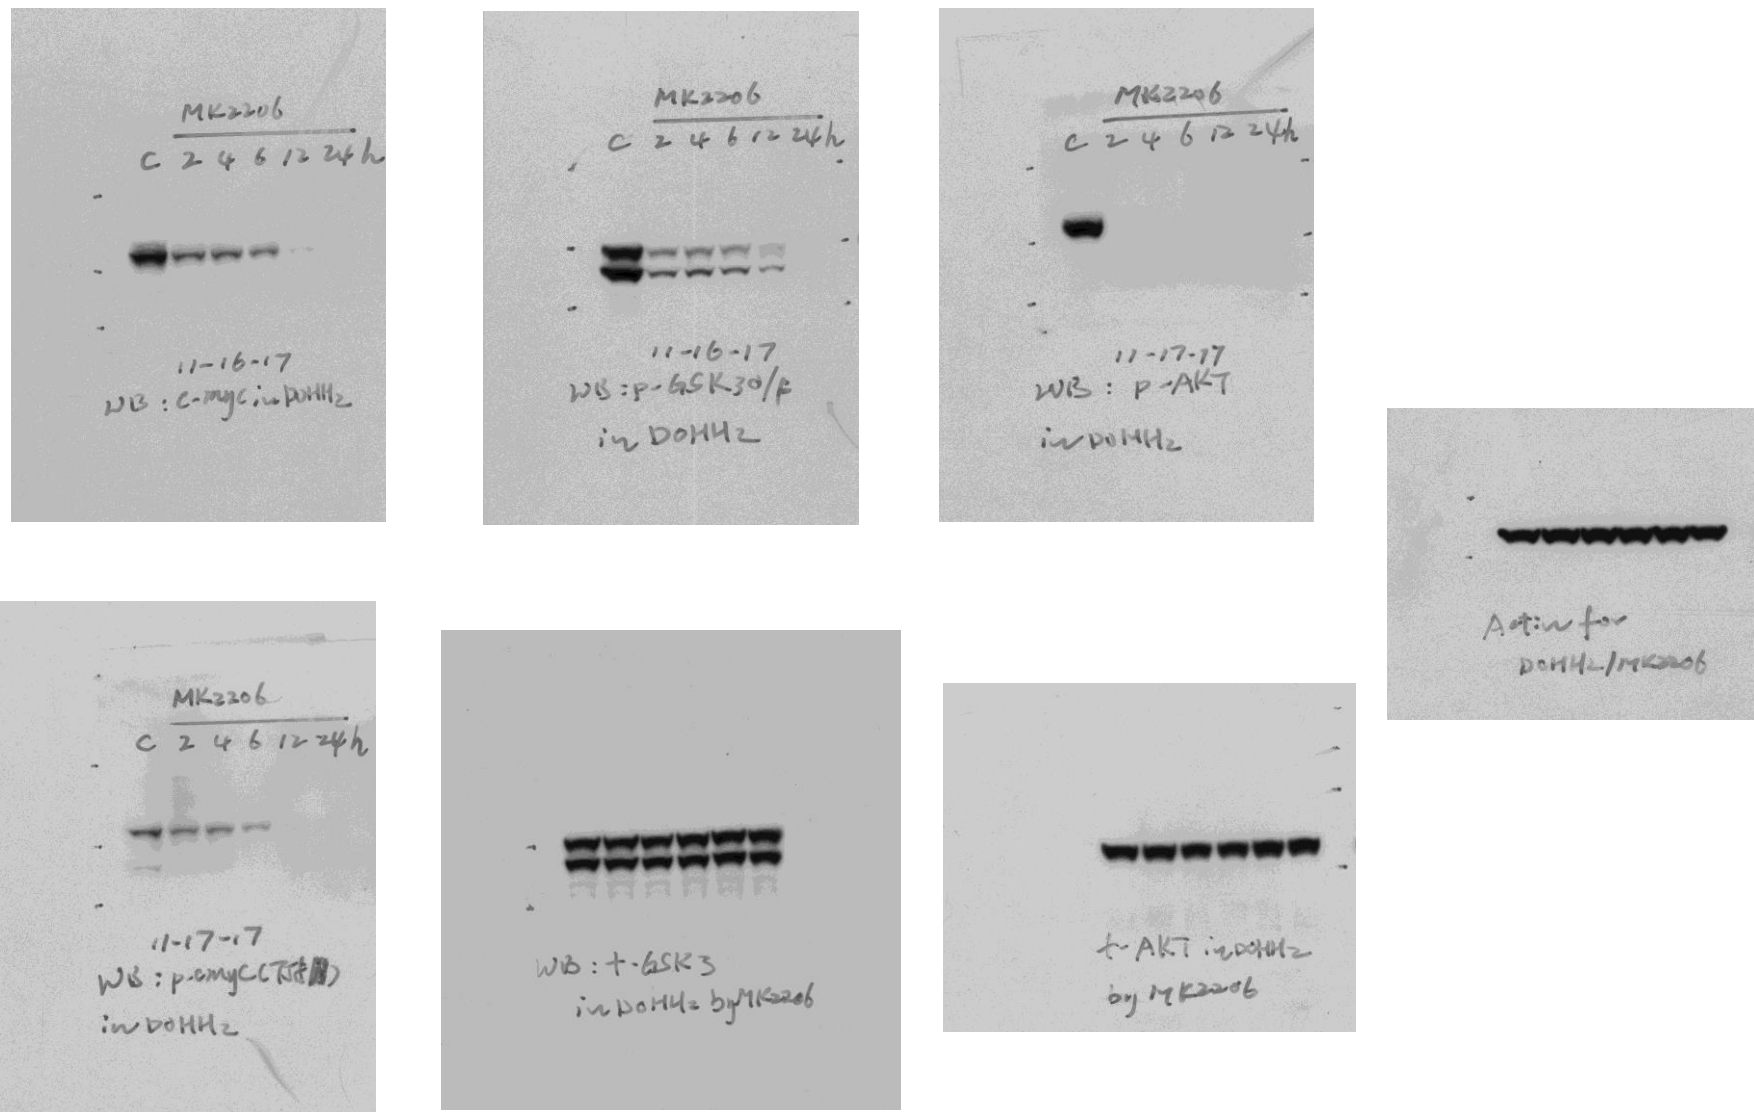

Supplementary Fig.1 F

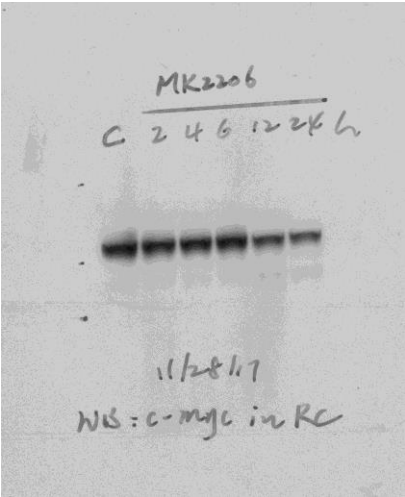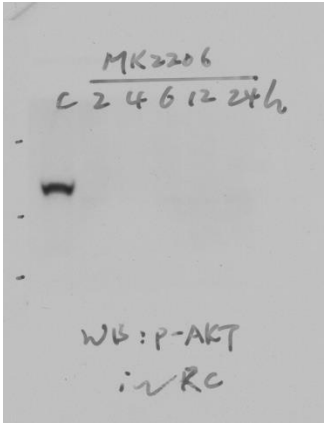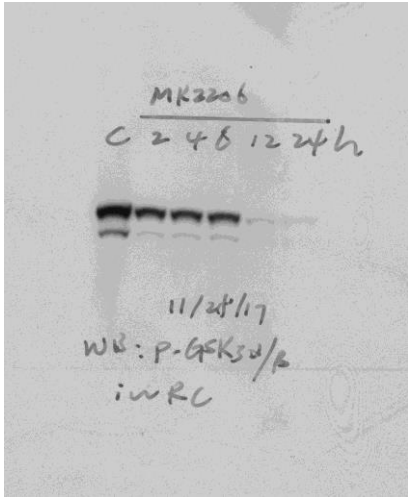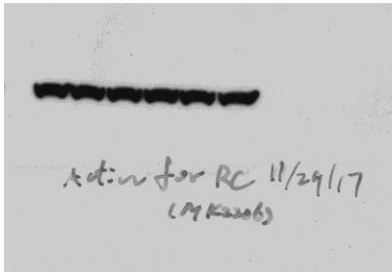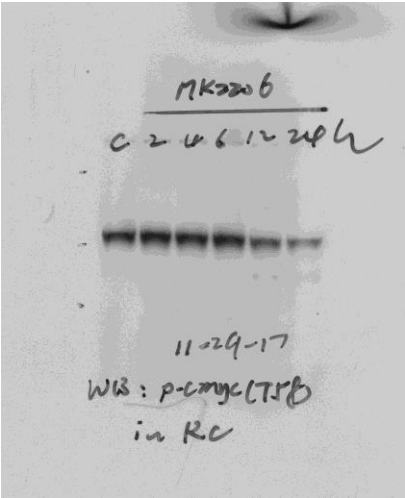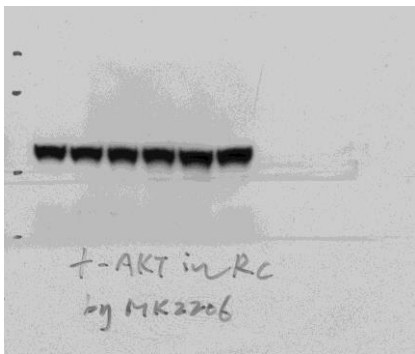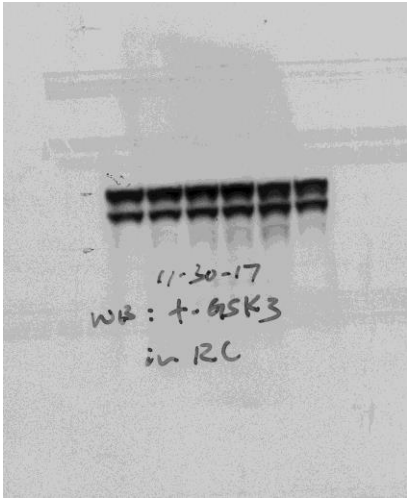

Supplementary Fig.2B

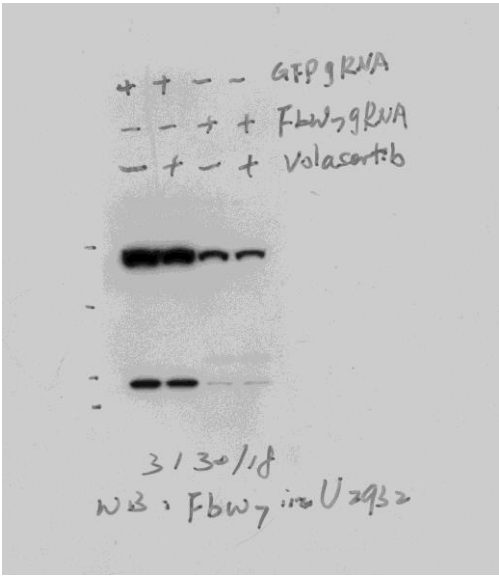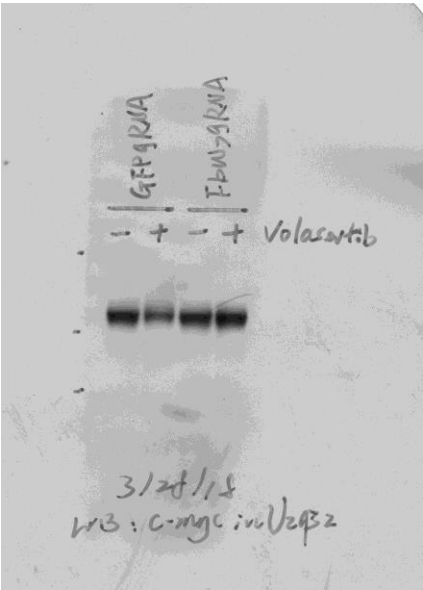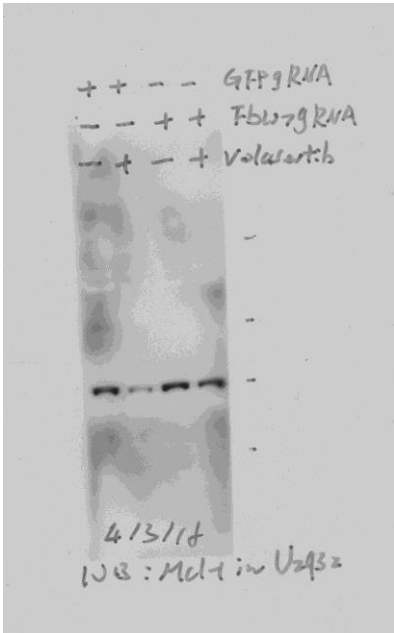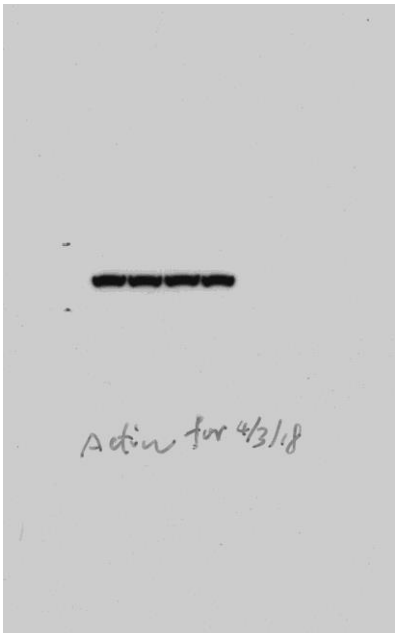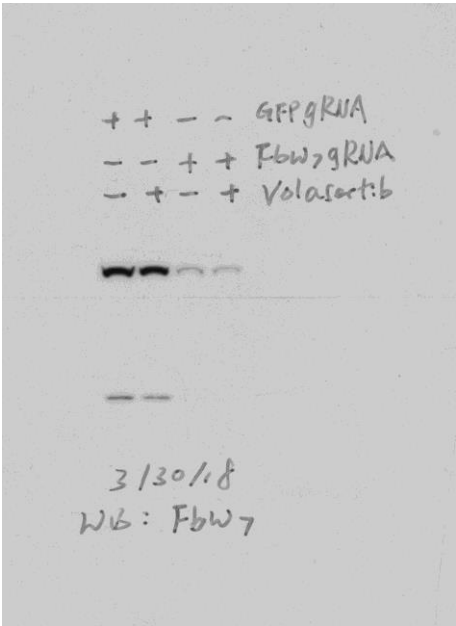

Supplementary Fig.2A

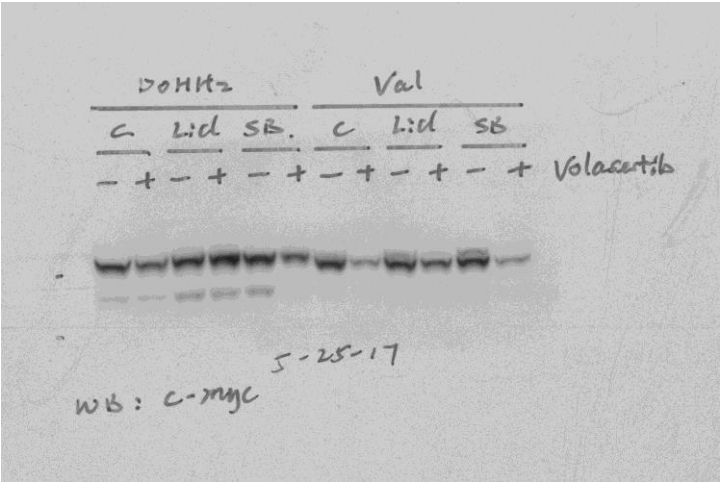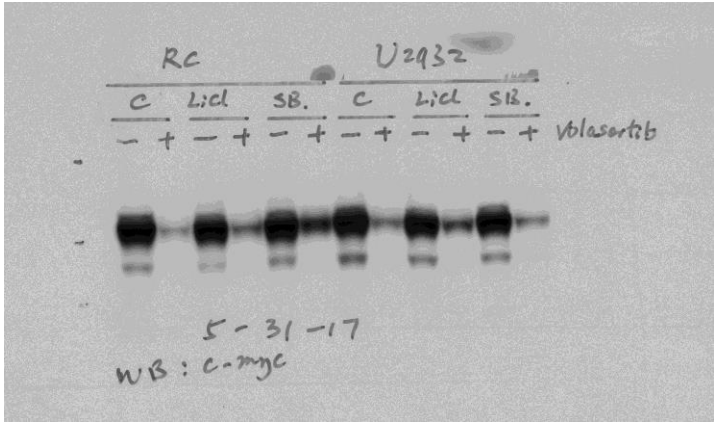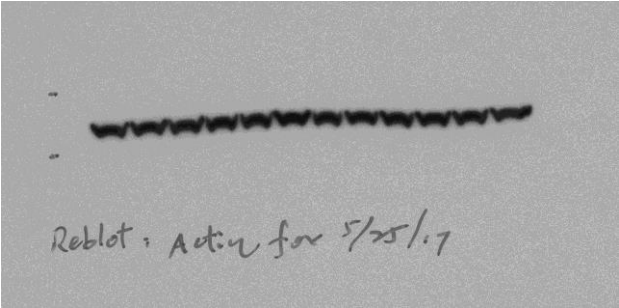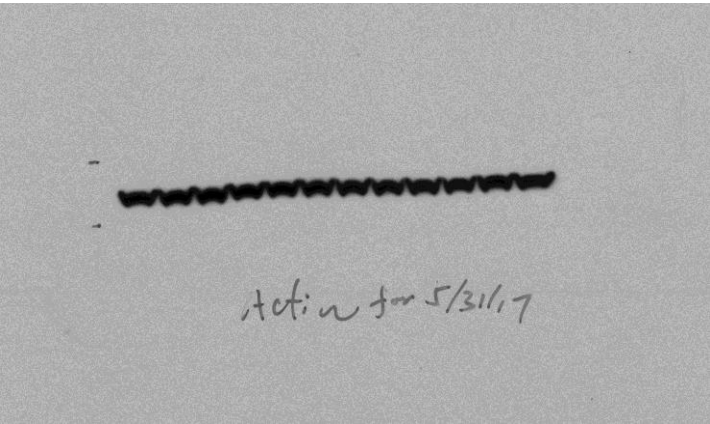

# Supplementary Figure 3B

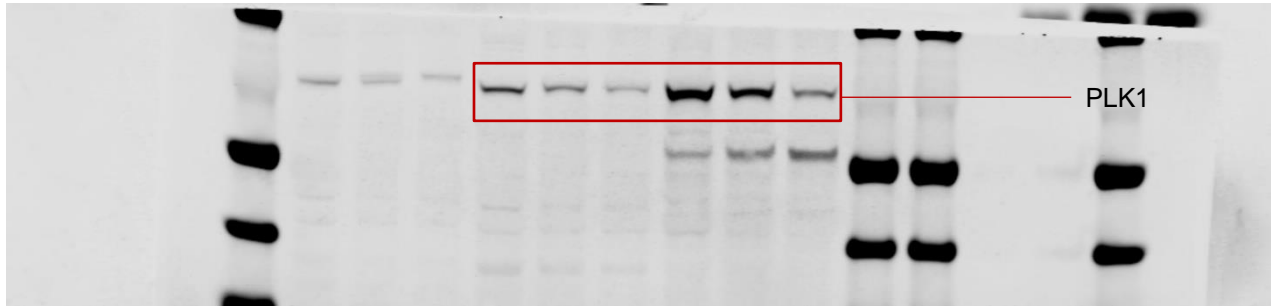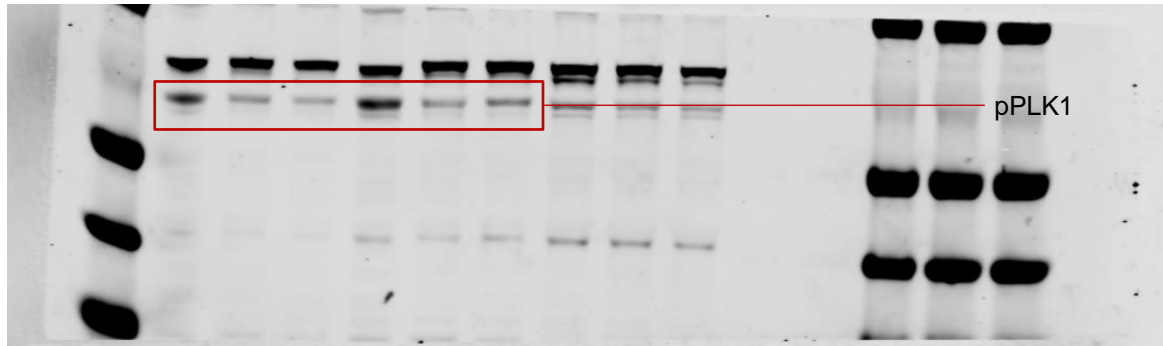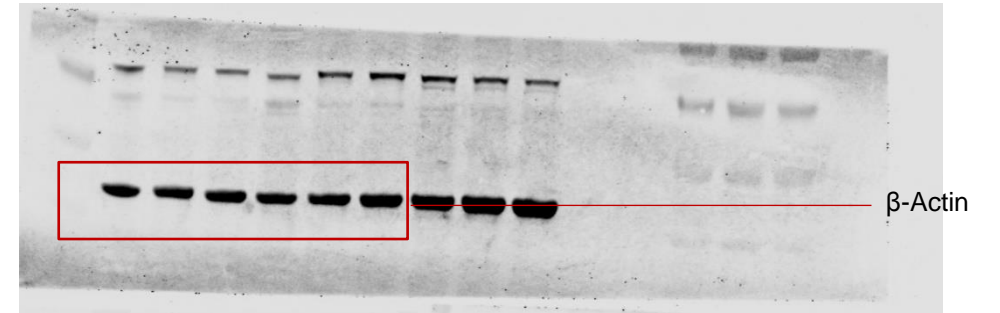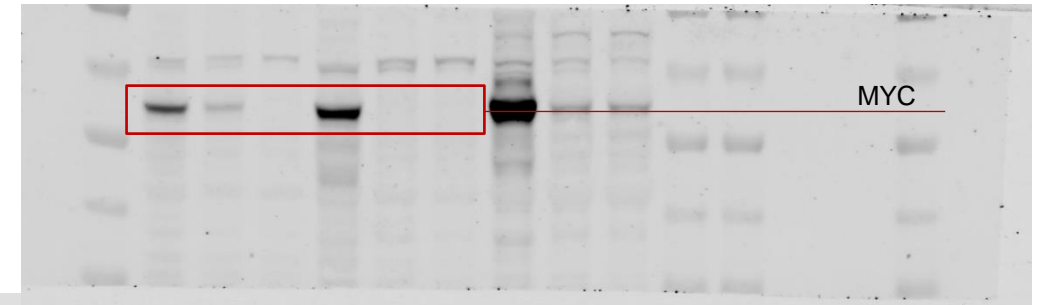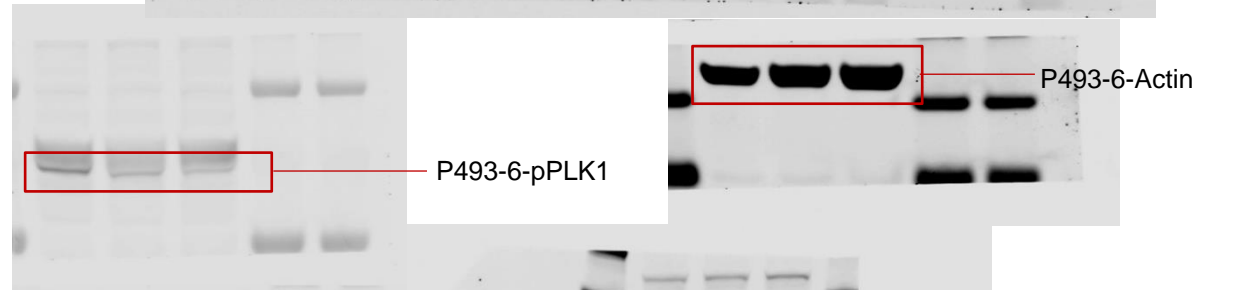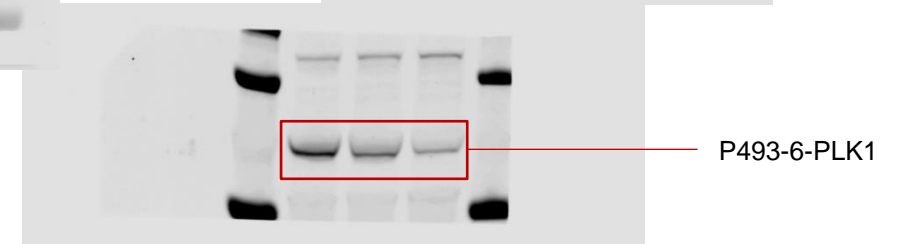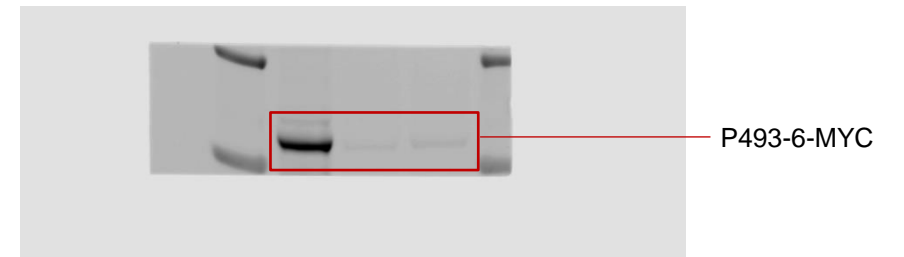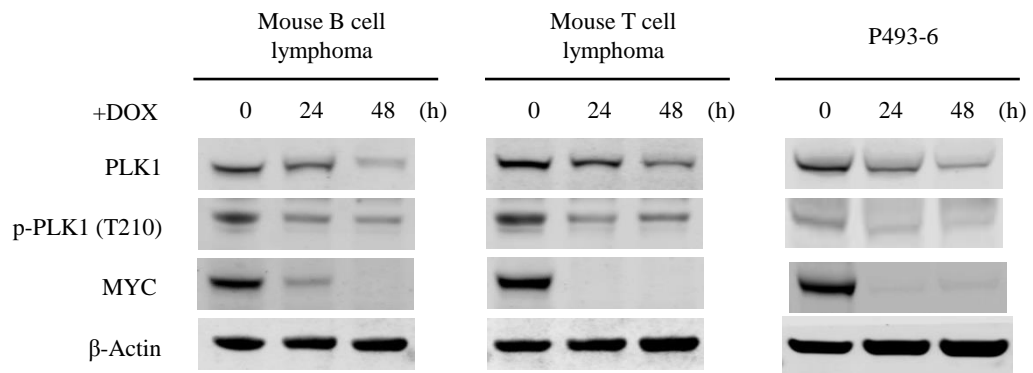

# Supplementary Figure 3C

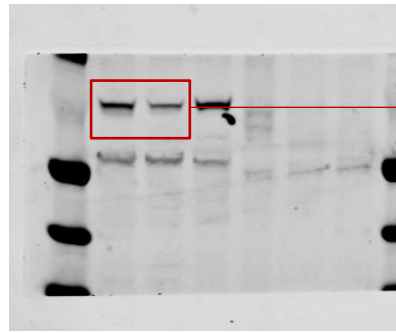

PLK1

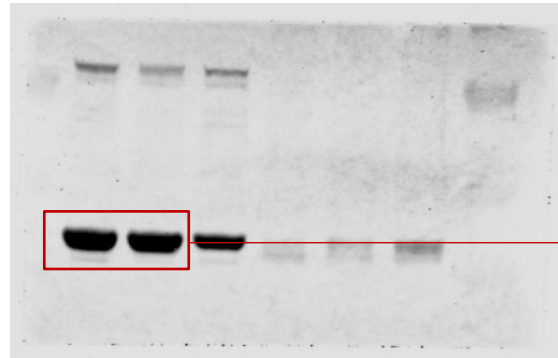

$\beta$ -Actin

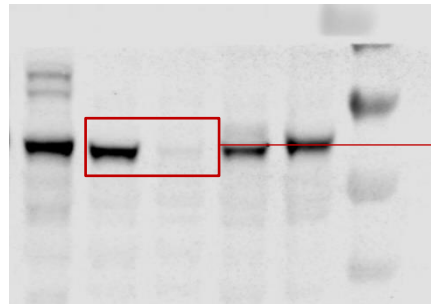

MYC

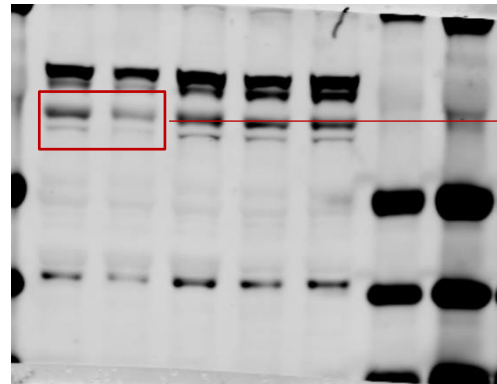

pPLK1

# Supplementary Fig.3 E

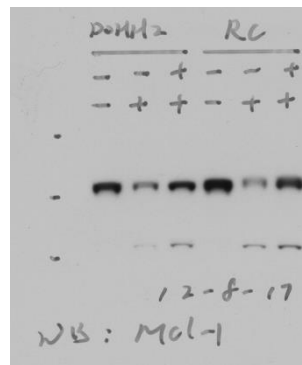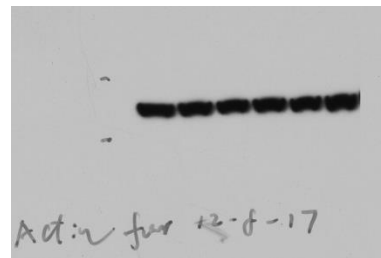

Supplement: sd1 [file 1]
